# Supplementary material
Source: PubMed Central journal article supplement (PMC3531572)
Supplement: NIHMS420659-supplement-2.pdf [file NIHMS420659-supplement-2.pdf]

Supplementary Figure 2

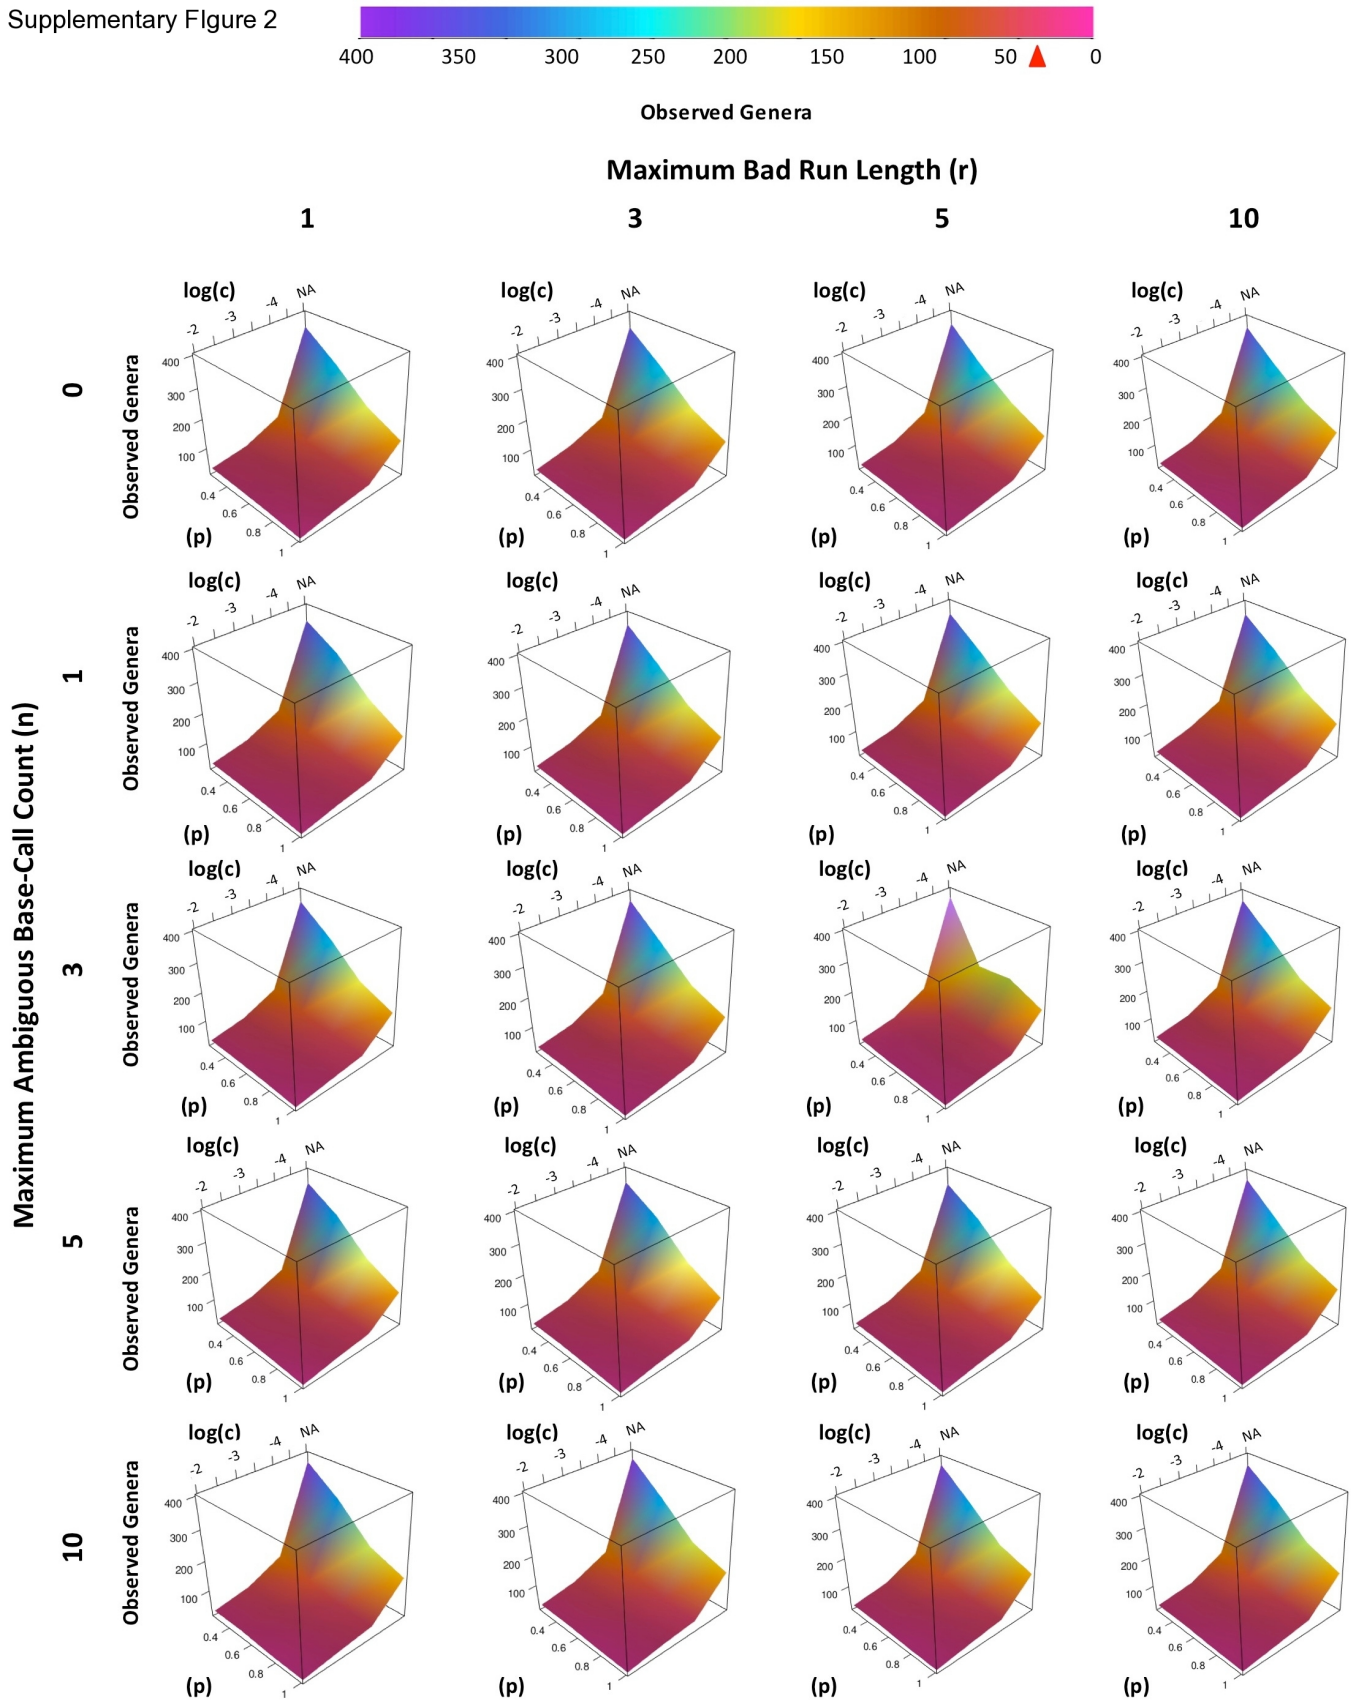

Supplementary Figure 2.  $\alpha$ -Diversity comparison of mock community reads filtered using select quality parameter settings (dataset 1). Genus-level taxon counts (z-axis) for mock communities filtered with variable split\_library\_fastq parameters, showing all cross-interactions between minimum per-read length as % total read length (p) (x-axes), OTU abundance threshold (c) (as %; y-axes), maximum bad run length (r) (increasing values left to right), and maximum ambiguous base-call count (n) (increasing values top to bottom) at multiple OTU minimum abundance thresholds (c). Red arrow below the color key indicates expected genus-level taxon count.

Supplementary Figure 3

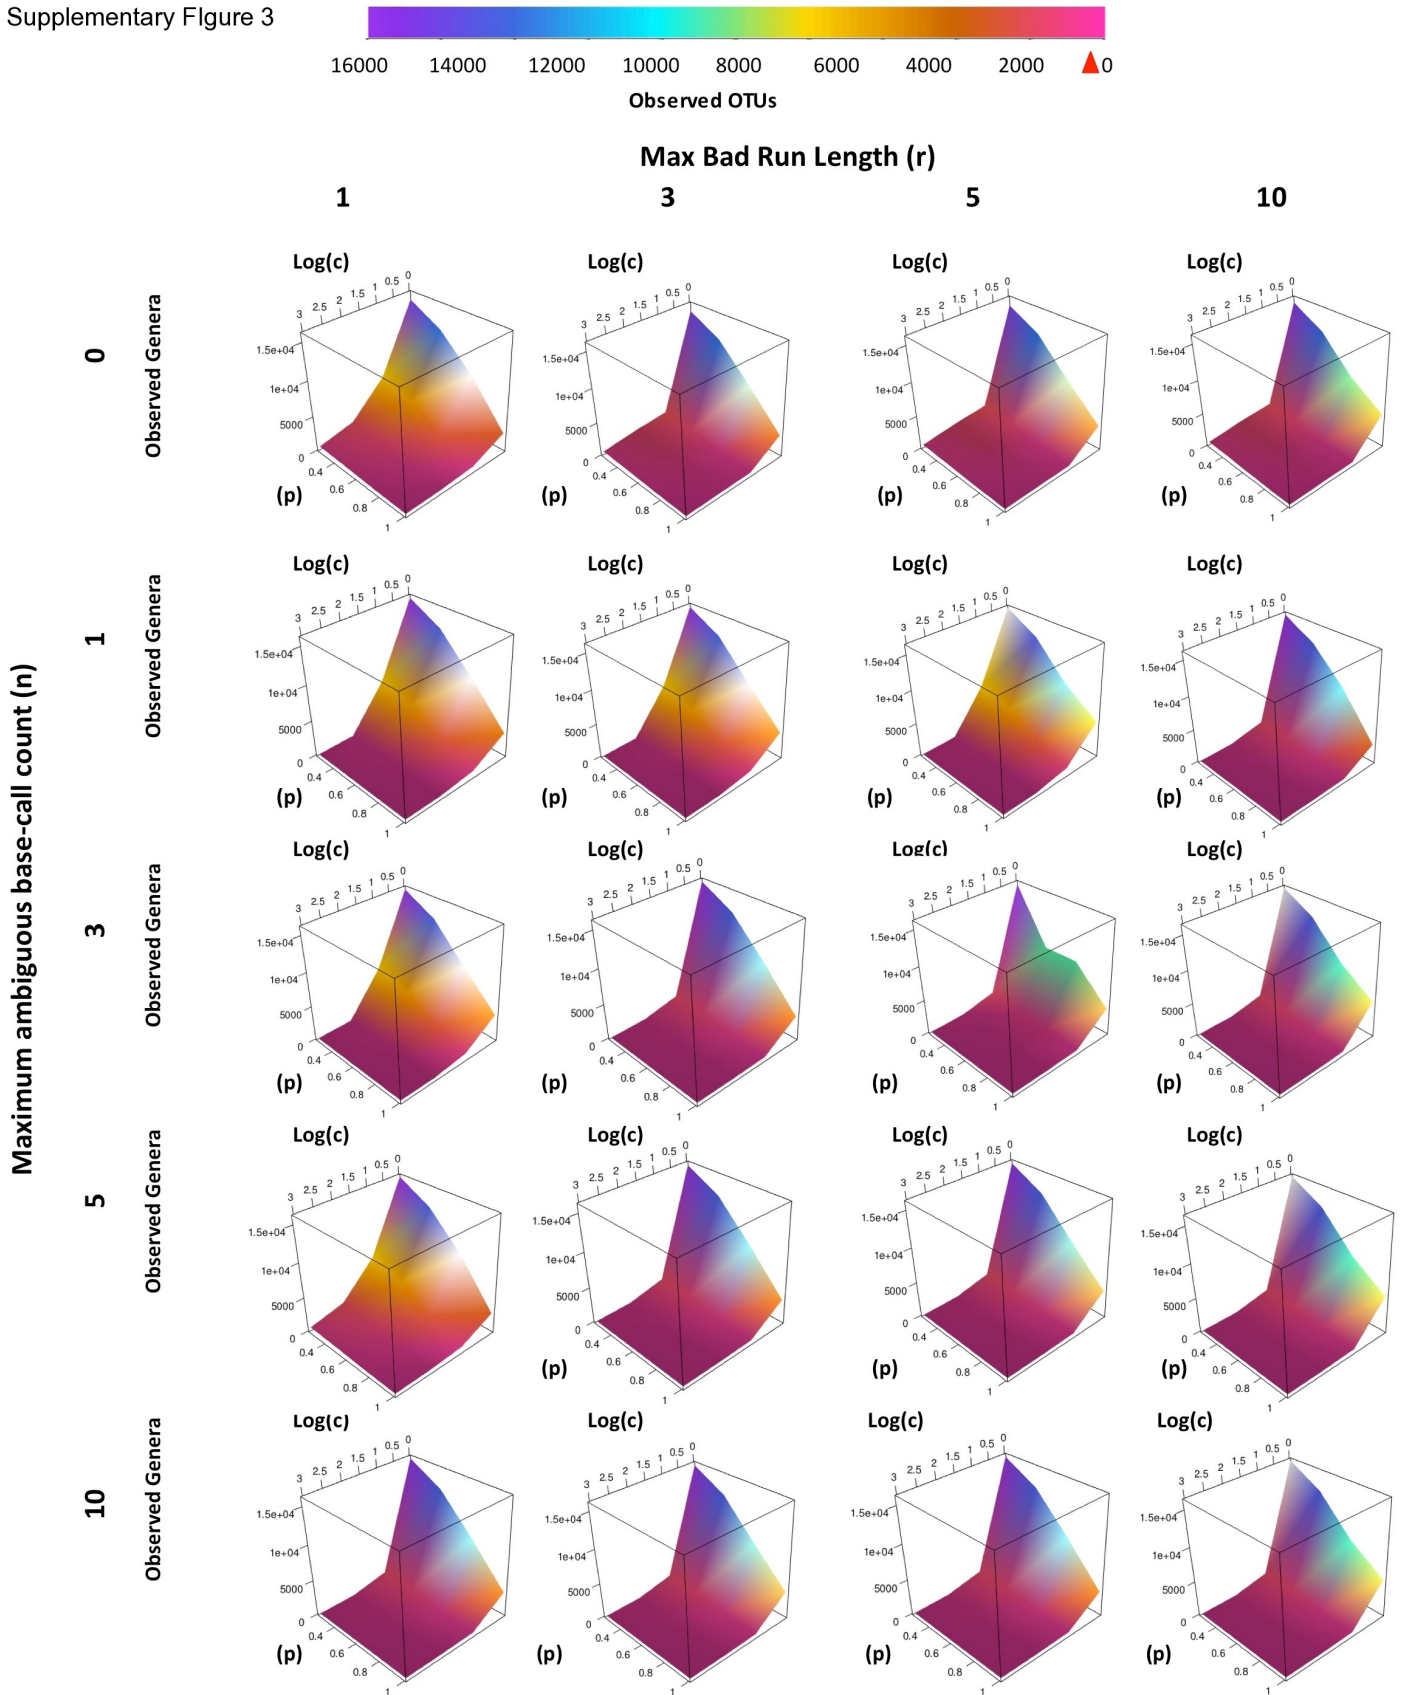

Supplementary Figure 3.  $\alpha$ -Diversity comparison of mock community reads filtered using select quality parameter settings (dataset 1). Observed counts (z-axis) of OTUs clustered at 97% similarity for mock communities filtered with variable `split_library_fastq.py` parameters, showing all cross-interactions between minimum per-read length as % total read length ( $p$ ) (x-axes), OTU abundance threshold ( $c$ ) (as absolute values) (y-axes), maximum bad run length ( $r$ ) (increasing values left to right), and maximum ambiguous base-call count ( $n$ ) (increasing values top to bottom) at multiple OTU minimum abundance thresholds ( $c$ ). Red arrow below the color key indicates expected species count.







Supplementary Figure 5

**Dataset**  
**Platform**  
**Length (bp)**  
**Genera**  
**Families**

**2**  
 MiSeq  
 250  
 19  
 19

**3**  
 MiSeq  
 150  
 19  
 19

**4**  
 HiSeq  
 90  
 10  
 8

**5**  
 HiSeq  
 100  
 23  
 13

**6**  
 MiSeq  
 150  
 23  
 13

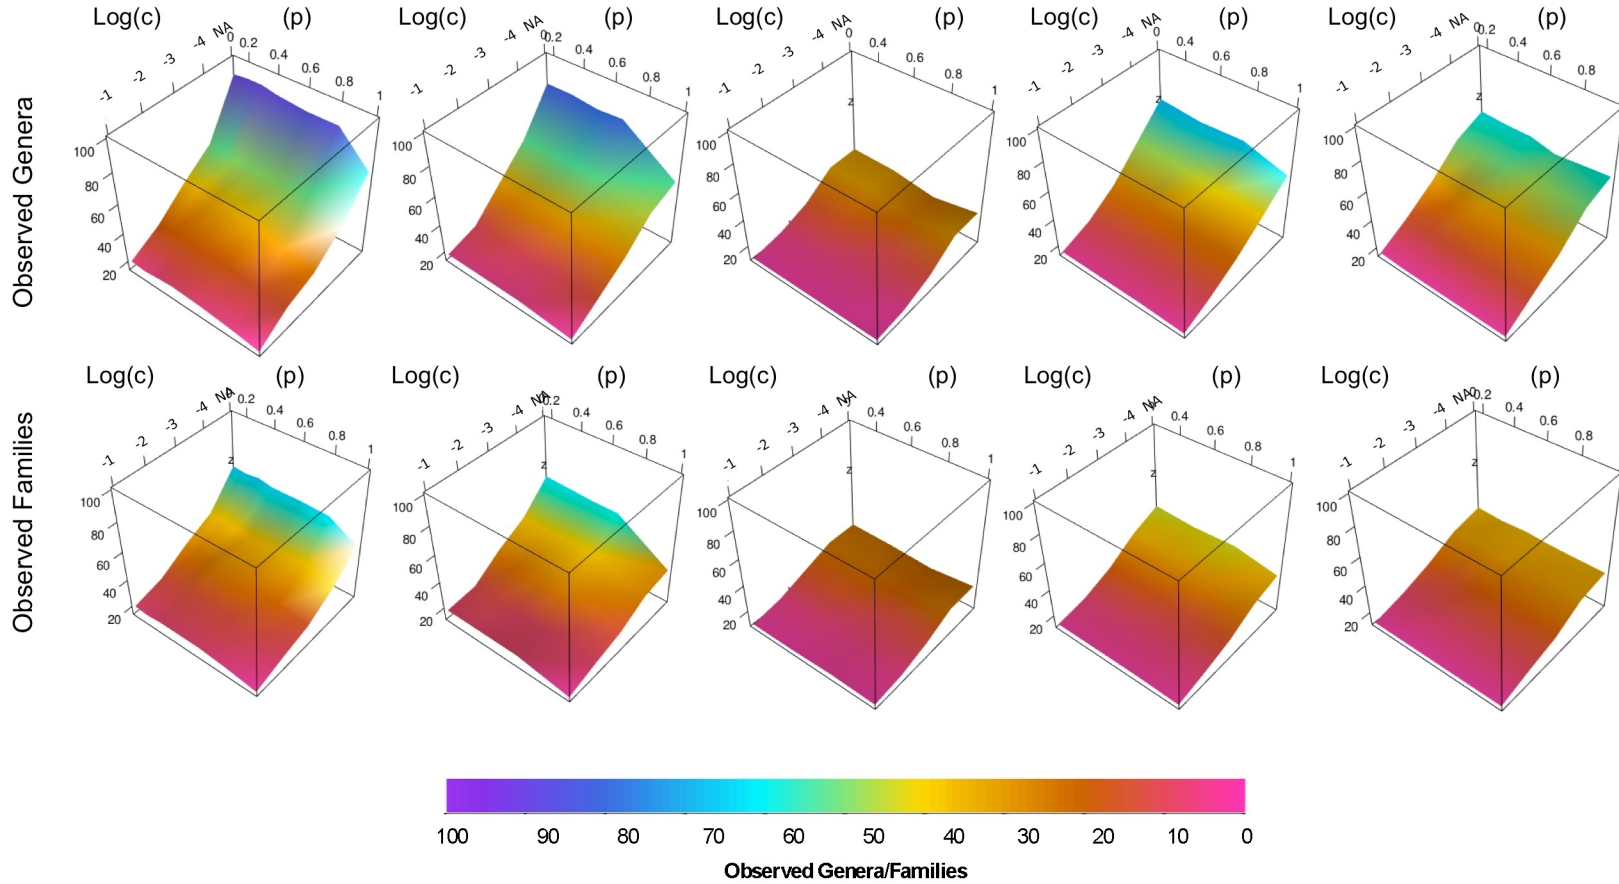

Supplementary Figure 5. Interaction of minimum per-read length (p) (as % total length) and OTU abundance threshold (c) (as %) on observed family and genus-level taxa (datasets 2-6). NA = no OTU abundance threshold applied. Heading indicates platform type, read length, and expected family- and genus-level counts.

Supplementary Figure 6

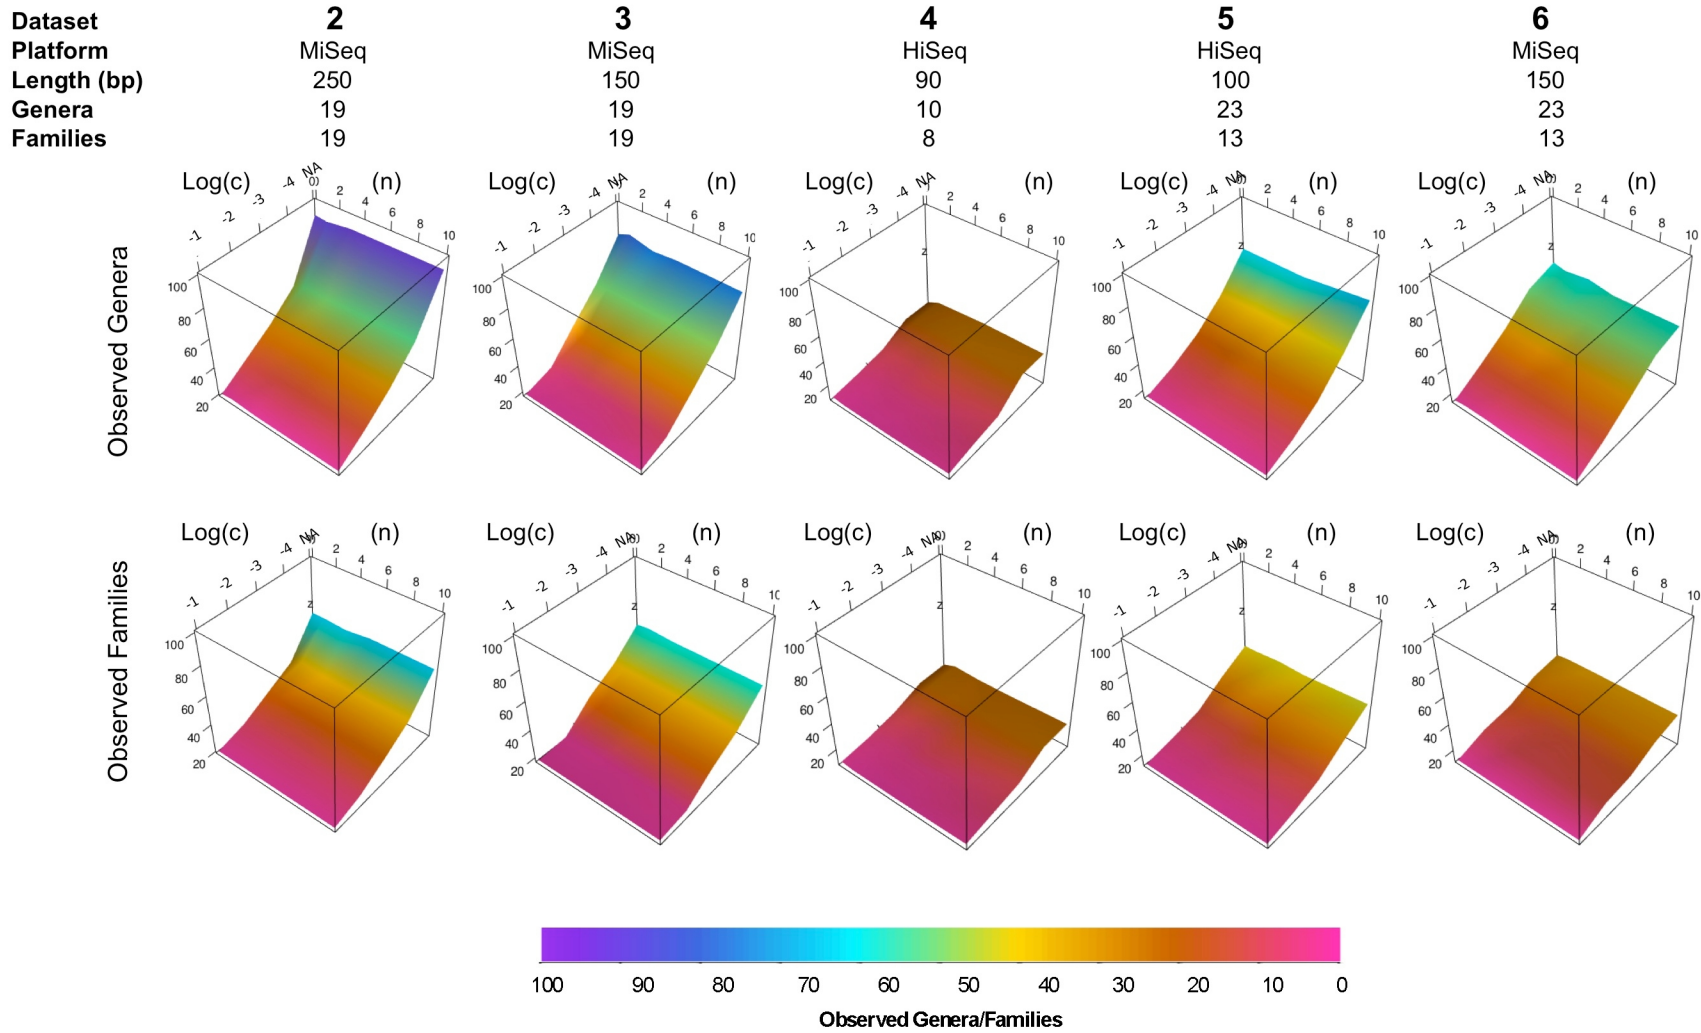

Supplementary Figure 6. Interaction of maximum ambiguous base-call count (n) and OTU abundance threshold (c) (as %) on observed family and genus-level taxa (datasets 2-6). NA = no OTU abundance threshold applied. Heading indicates platform type, read length, and expected family- and genus-level counts.

Supplementary Figure 7

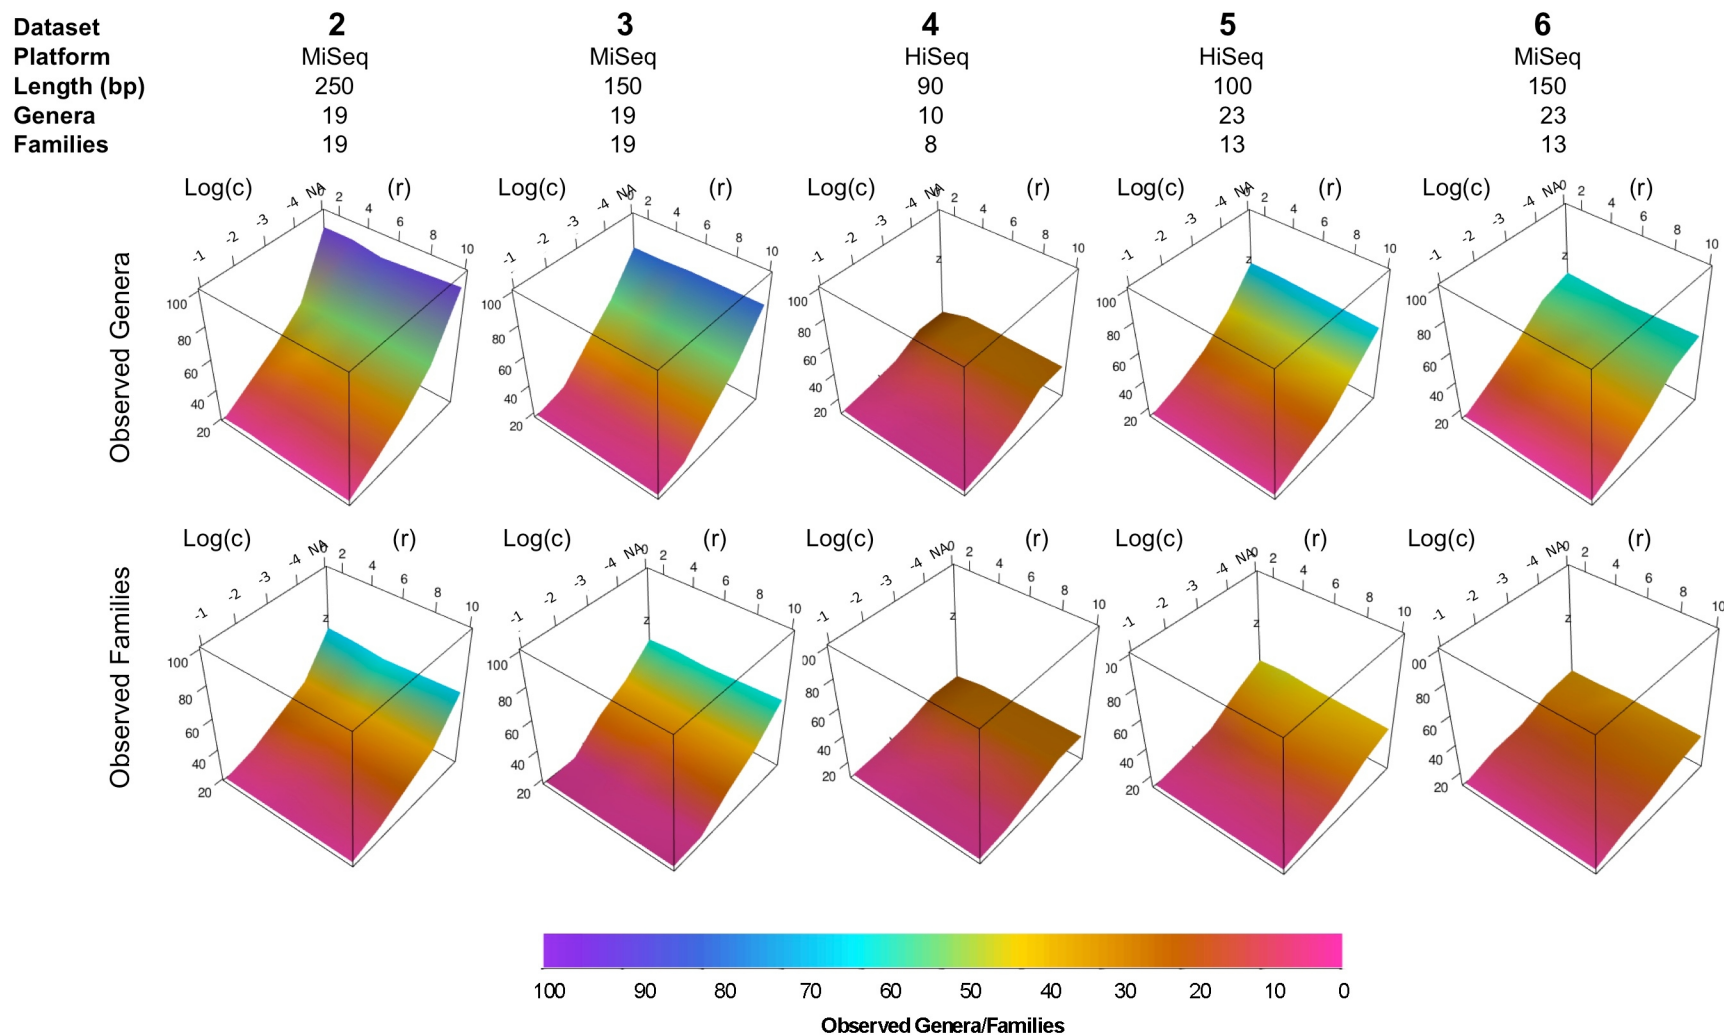

Supplementary Figure 7. Interaction of maximum bad run length ( $r$ ) and OTU abundance threshold ( $c$ ) (as %) on observed family- and genus-level taxa (datasets 2-6). NA = no OTU abundance threshold was applied. Heading indicates type of sequencing platform used, read length, and expected family- and genus-level counts.



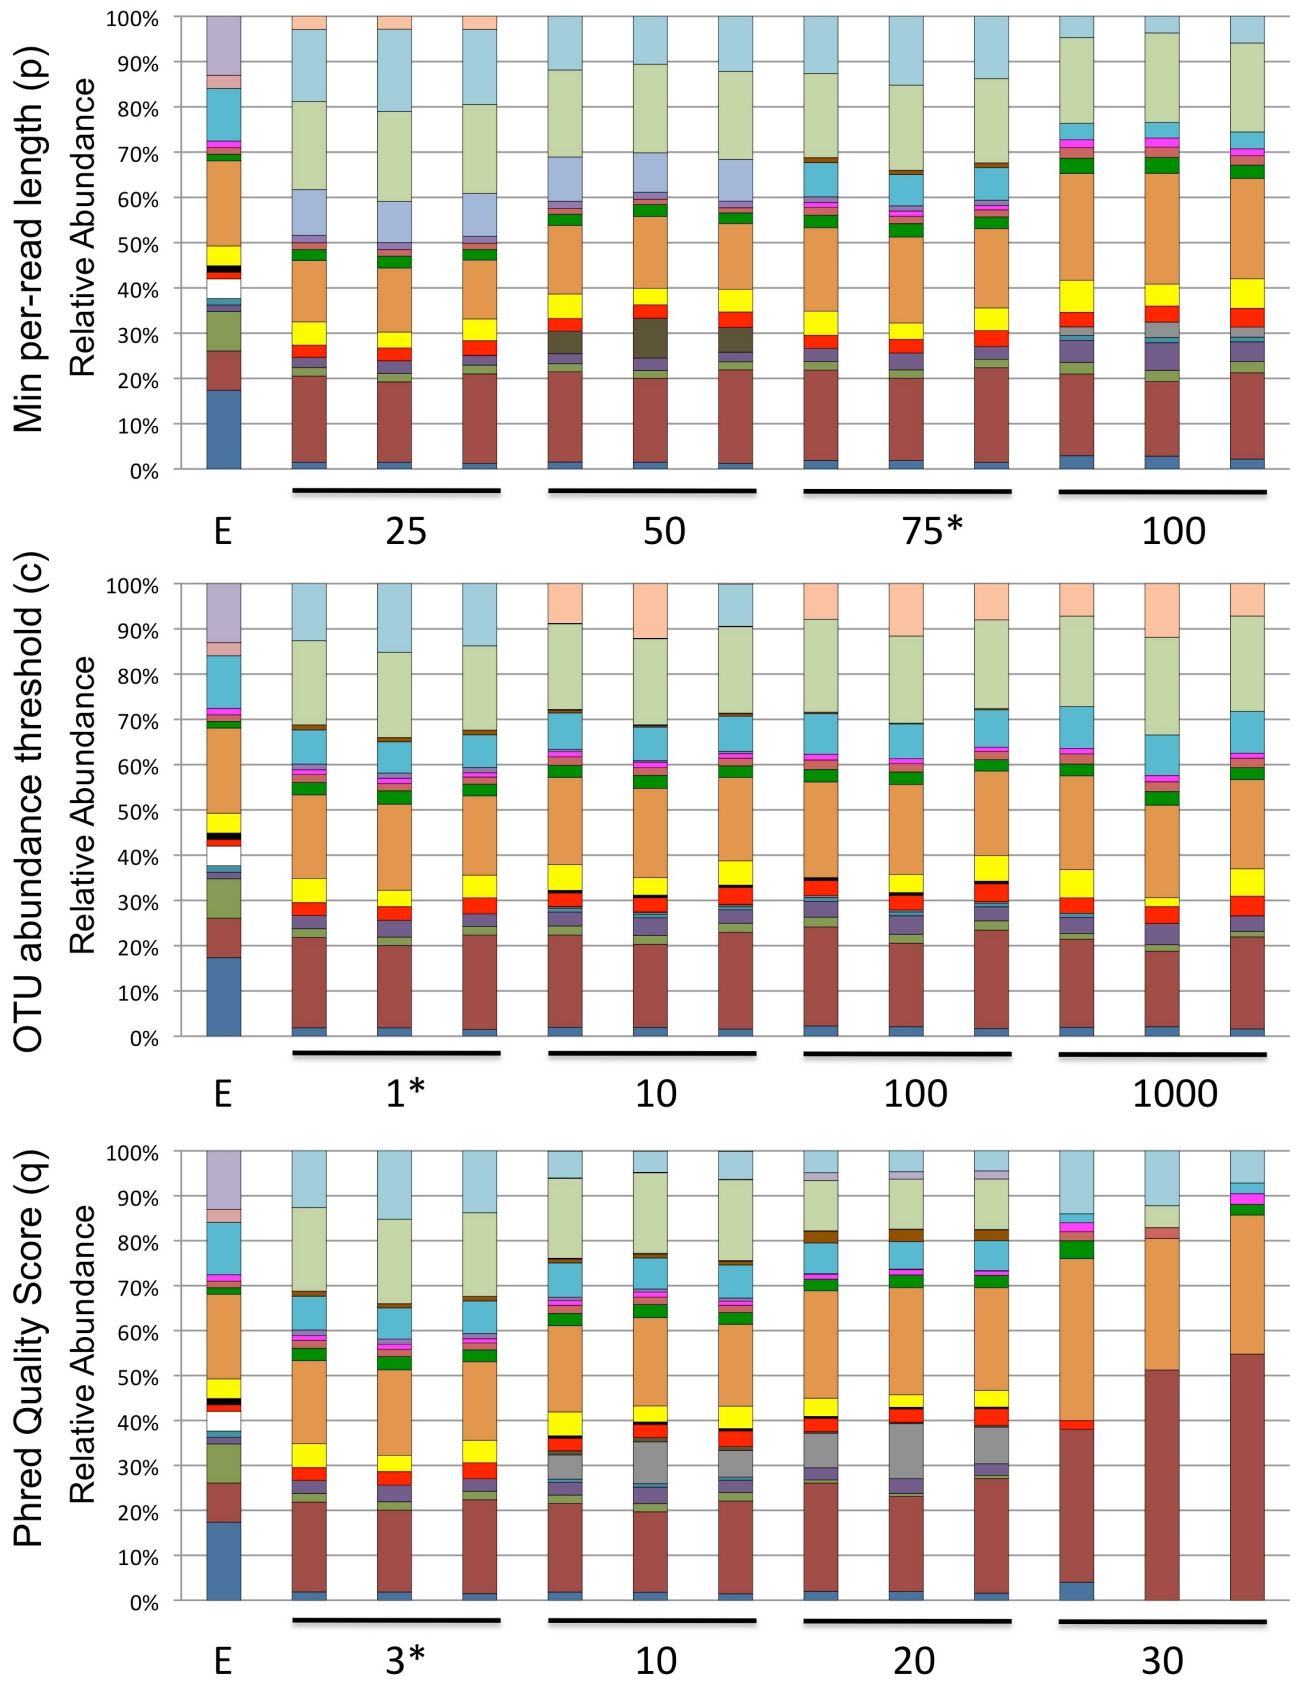

Supplementary Figure 8. Family-level taxonomic distribution of mock communities filtered using variable p (as % total length), c, and q thresholds (dataset 1). All other parameters were held constant. E, expected values. \*default parameters.

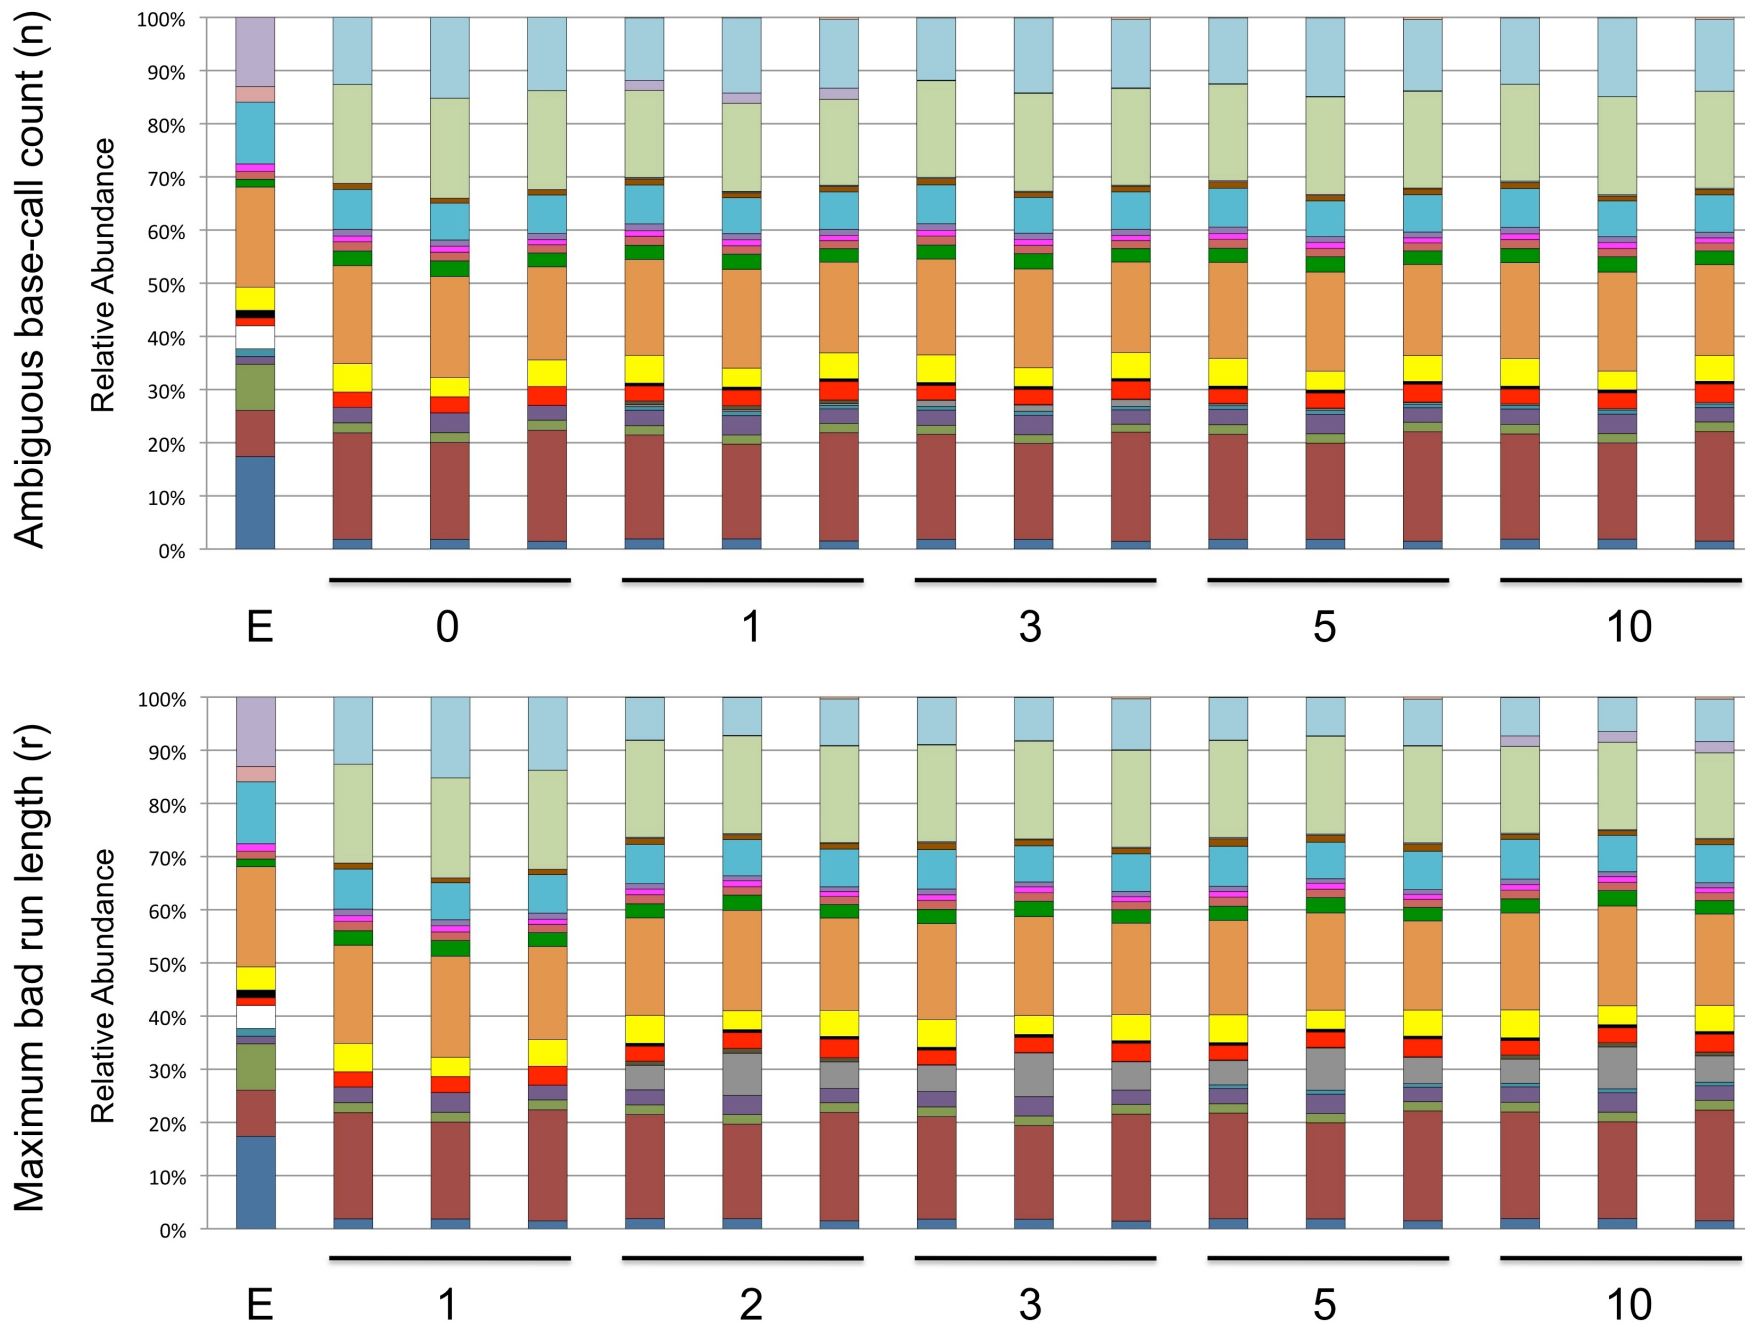

Supplementary Figure 9. Family-level taxonomic Distribution of mock communities filtered using variable  $n$  and  $r$  thresholds (dataset 1). All other parameters were held constant. E, expected values.

Supplementary Figure 10. Taxonomic key to Supplementary Figures 8 and 9.

- *Unassignable*
- *Bacteria;Other*
- *Proteobacteria;Gammaproteobacteria;Enterobacteriales;Enterobacteriaceae*
- *Proteobacteria;Gammaproteobacteria;Other;Other*
- *Actinobacteria;Actinobacteria;Coriobacteriales;Coriobacteriaceae*
- *Actinobacteria;Actinobacteria;Other;Other*
- *Actinobacteria;Actinobacteria;Bifidobacteriales;Other*
- *Actinobacteria;Actinobacteria;Bifidobacteriales;Bifidobacteriaceae*
- *Bacteroidetes;Bacteroidia;Bacteroidales;Other*
- *Bacteroidetes;Bacteroidia;Bacteroidales;Rikenellaceae*
- *Bacteroidetes;Bacteroidia;Bacteroidales;Porphyromonadaceae*
- *Bacteroidetes;Bacteroidia;Bacteroidales;Prevotellaceae*
- *Bacteroidetes;Bacteroidia;Bacteroidales;Bacteroidaceae*
- *Tenericutes;Erysipelotrichi;Erysipelotrichales;Erysipelotrichaceae*
- *Firmicutes;Negativicutes;Selenomonadales;Veillonellaceae*
- *Firmicutes;Bacilli;Lactobacillales;Streptococcaceae*
- *Firmicutes;Clostridia;Other;Other*
- *Firmicutes;Clostridia;Clostridiales;Other*
- *Firmicutes;Clostridia;Clostridiales;Eubacteriaceae*
- *Firmicutes;Clostridia;Clostridiales;Peptococcaceae*
- *Firmicutes;Clostridia;Clostridiales;Clostridiales Family XI. Incertae Sedis*
- *Firmicutes;Clostridia;Clostridiales;Ruminococcaceae*
- *Firmicutes;Clostridia;Clostridiales;Lachnospiraceae*
- *Firmicutes;Clostridia;Clostridiales;Clostridiaceae*



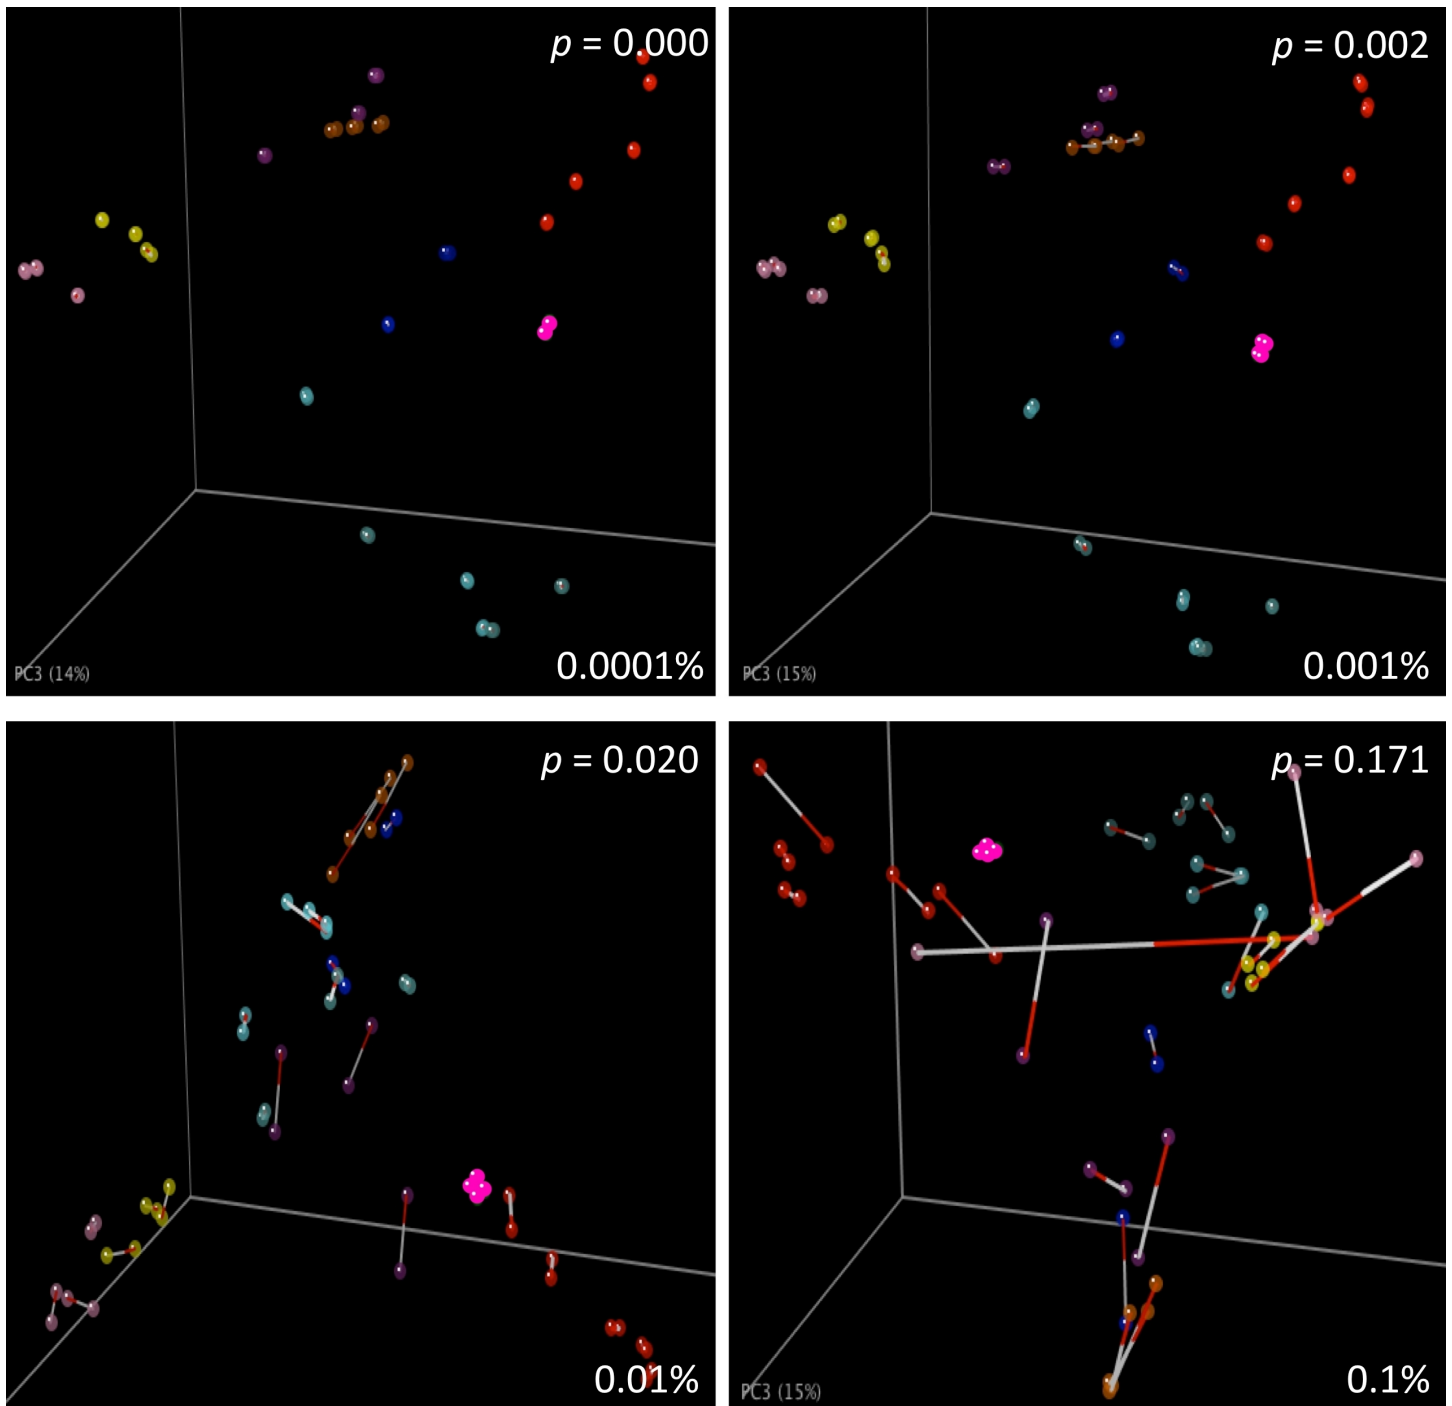

Supplementary Figure 11. Procrustes PCoA of GAllx weighted UniFrac distance biplot comparing variation in OTU abundance threshold ( $c$ ), using Illumina GAllx data (dataset 1). Comparison of  $c$  setting listed in bottom-right corner to dataset without  $c$  filtering. Top-right corner indicates Bonferroni-corrected P-value for Procrustes goodness of fit. Red, feces; Magenta, mock community; Cyan, skin; Dark cyan, tongue; Blue, freshwater; Orange, freshwater creek; Purple, ocean; Yellow, estuary sediment; Pink, soil.

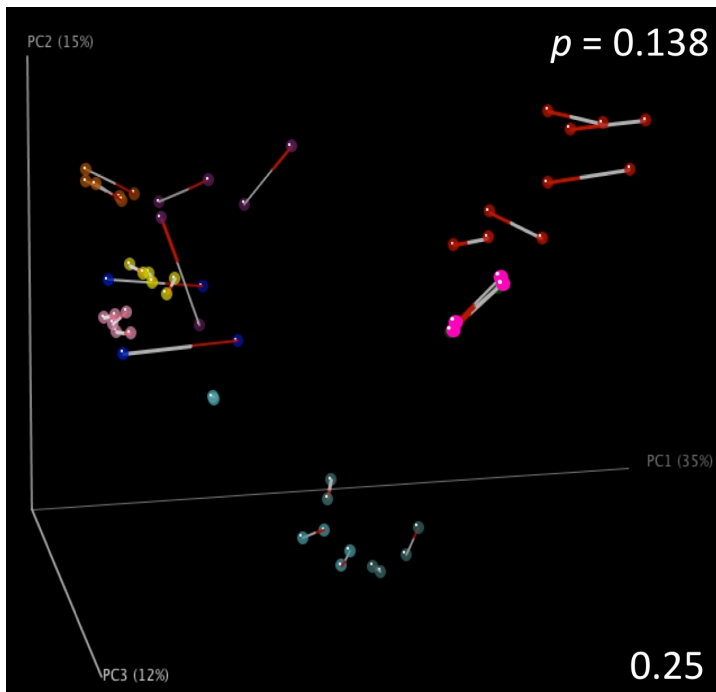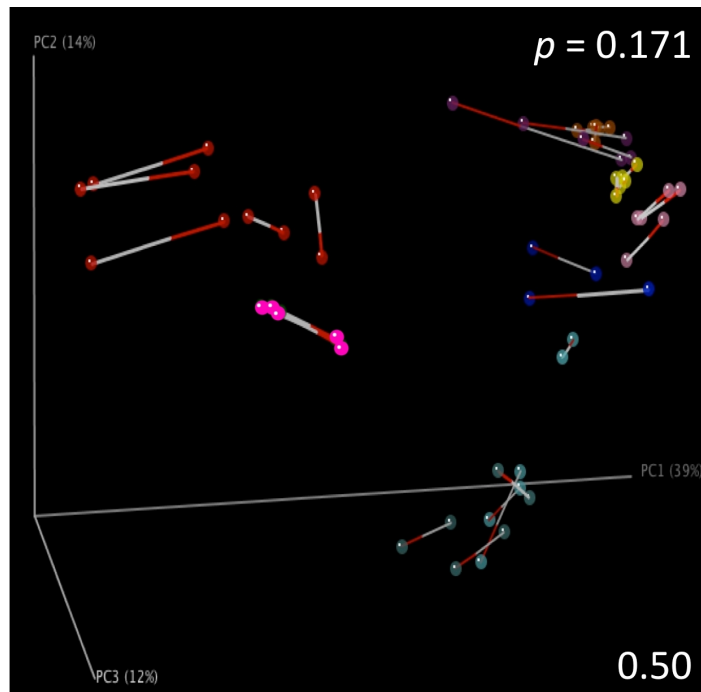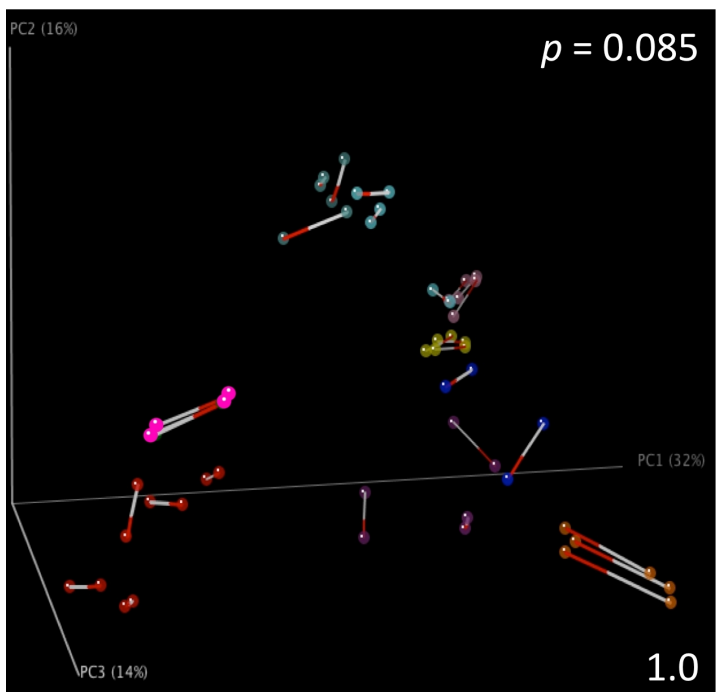

Supplementary Figure 12. Procrustes PCoA weighted UniFrac distance biplot comparing variation in minimum per-read length ( $p$ ) (as % total read length), using Illumina GAIIx data (dataset 1). Comparison of setting listed in bottom-right corner to  $p = 0.75$ . Top-right corner indicates Bonferroni-corrected P-value for Procrustes goodness of fit. Red, human feces; Magenta, mock community; Cyan, human skin; Dark cyan, human tongue; Blue, freshwater; Orange, freshwater creek; Purple, ocean; Yellow, estuary sediment; Pink, soil.

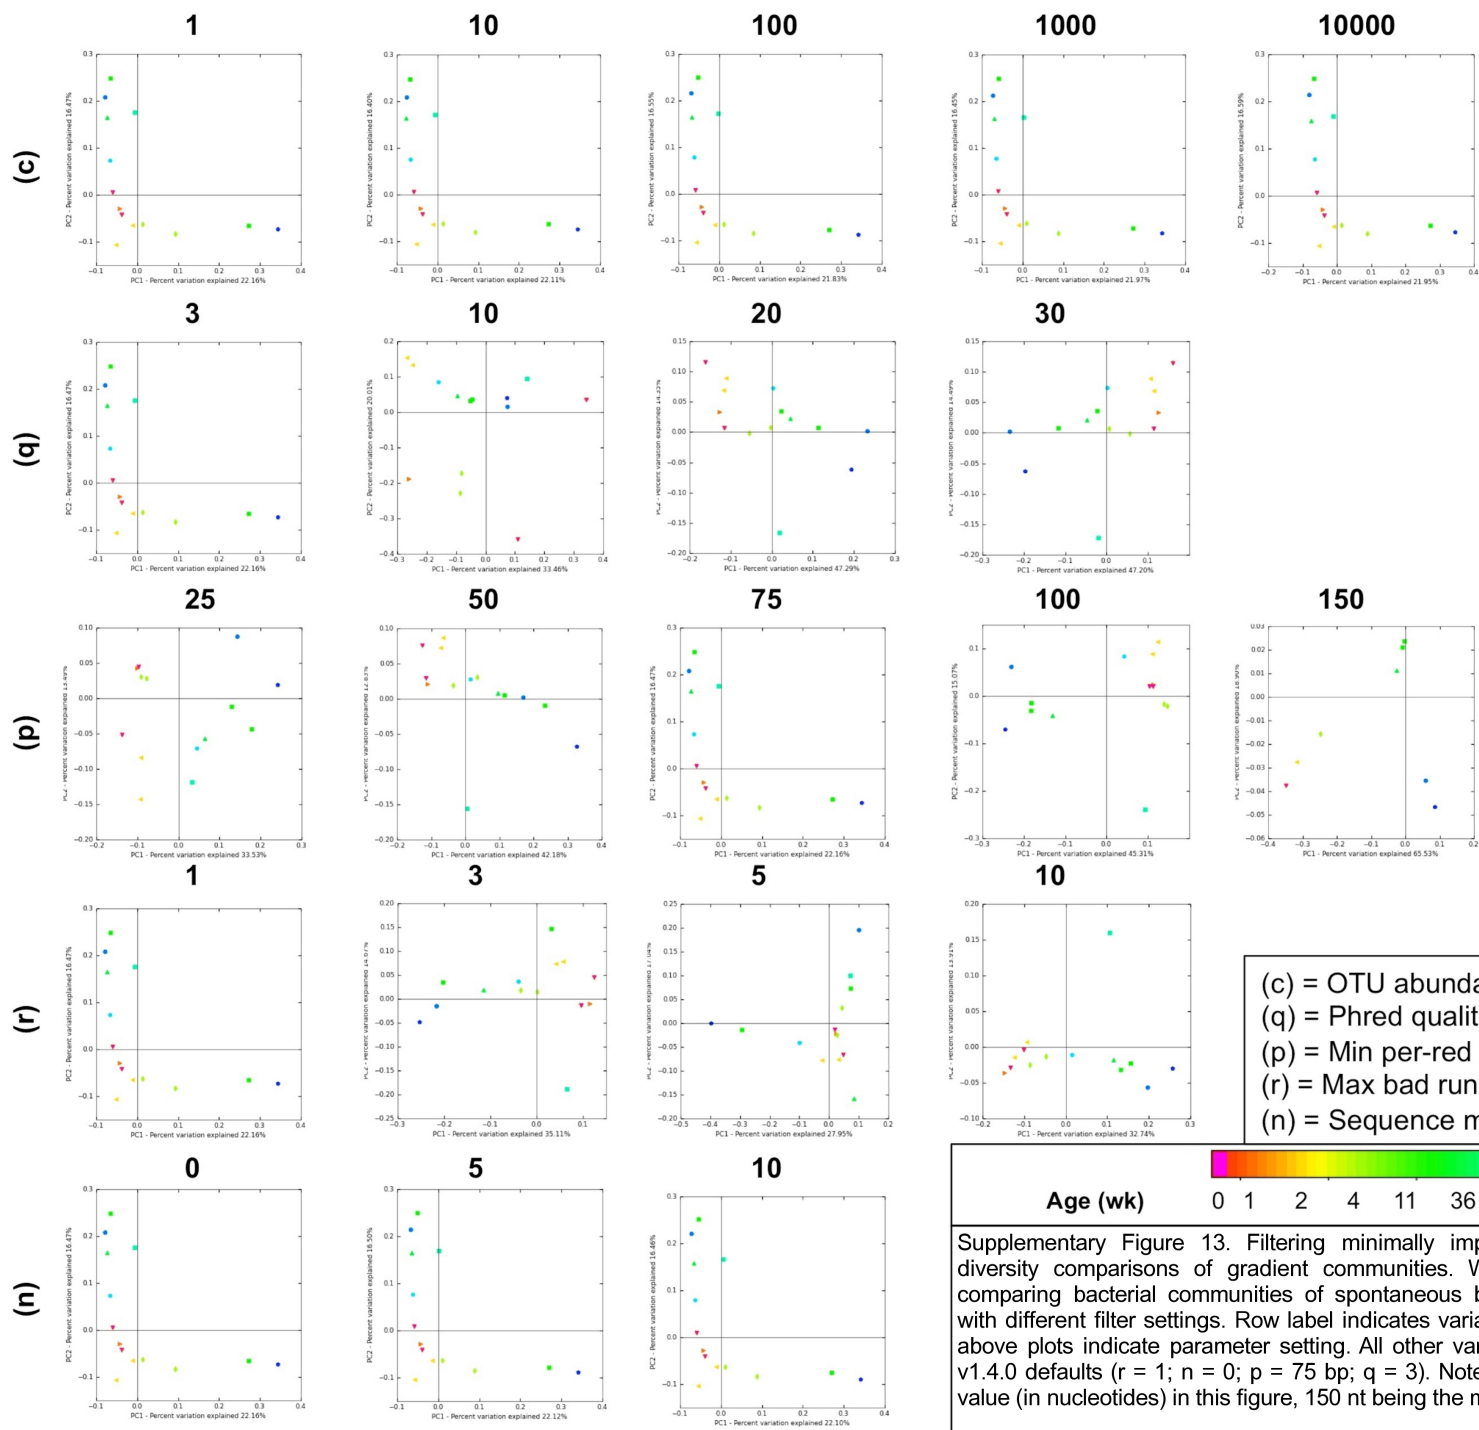



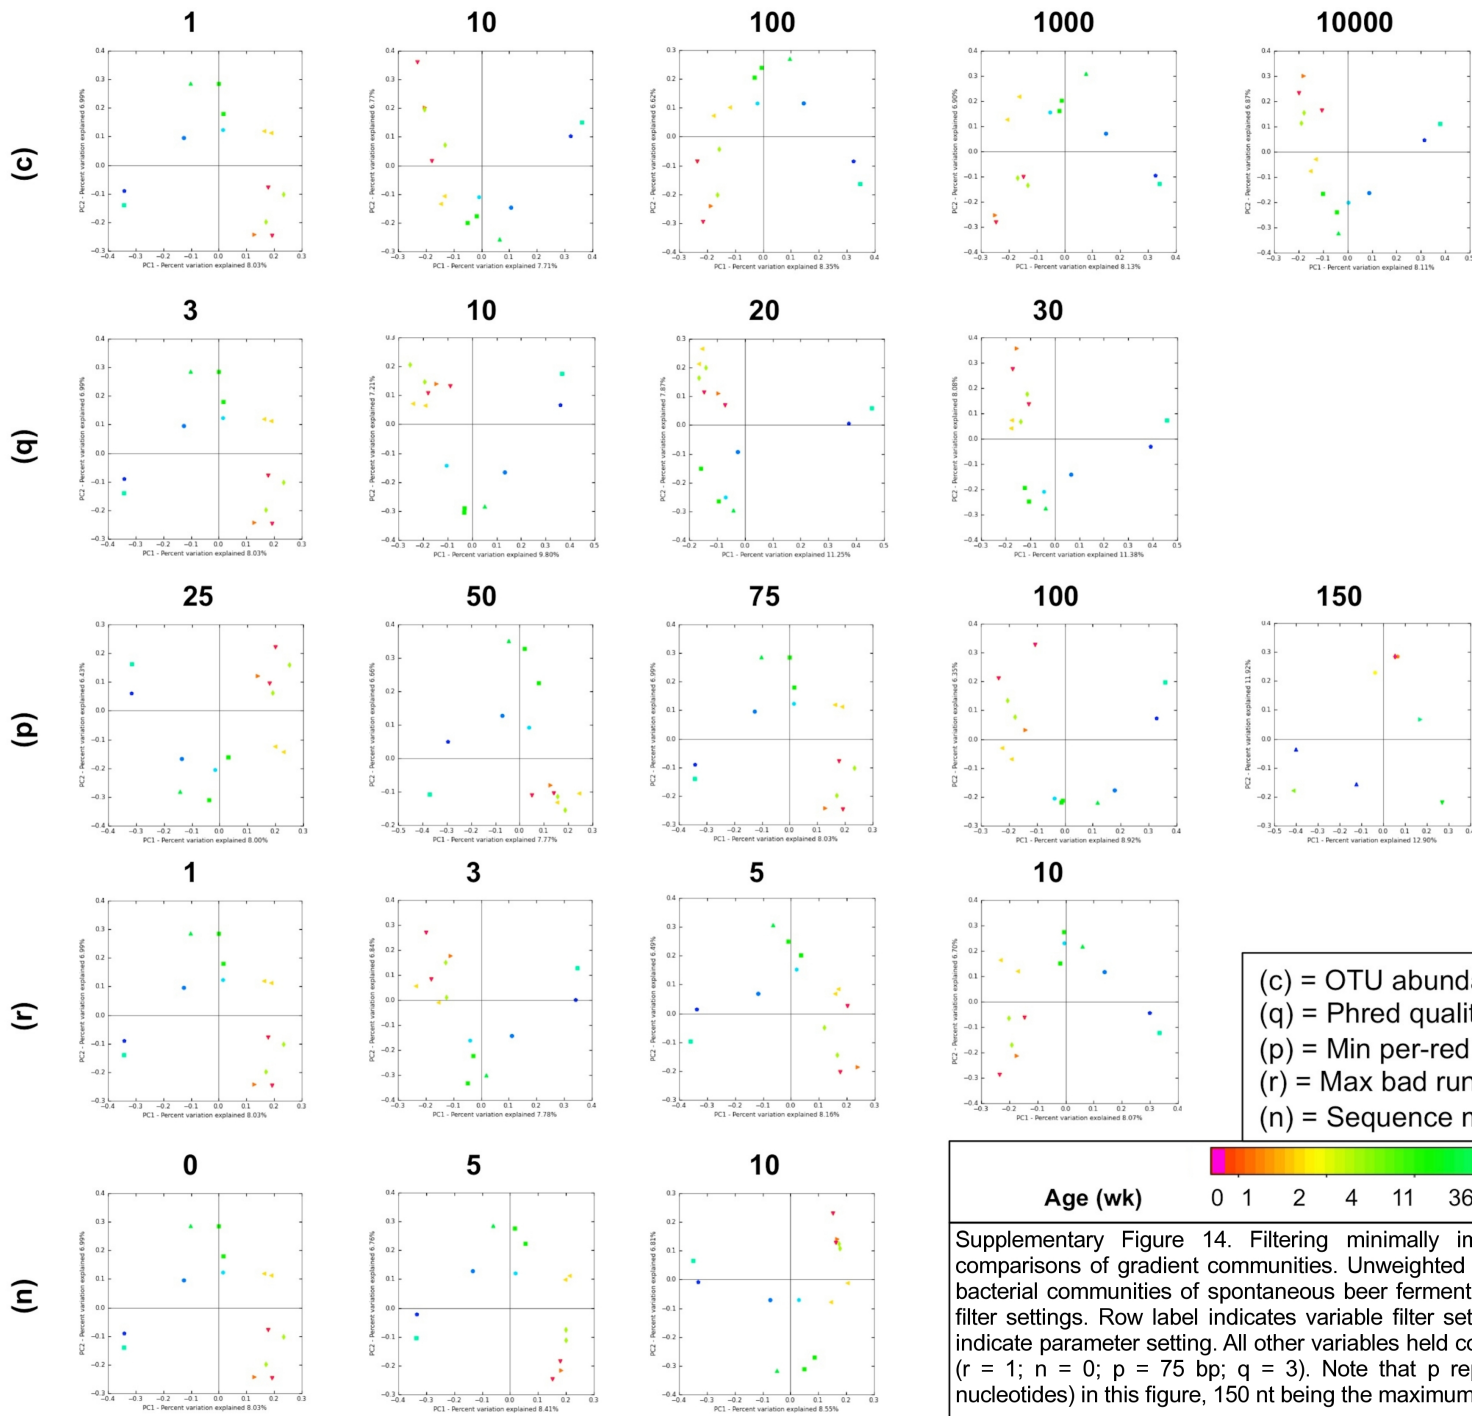

(c) = OTU abundance threshold  
(q) = Phred quality score threshold  
(p) = Min per-read length  
(r) = Max bad run length  
(n) = Sequence max N

Supplementary Figure 14. Filtering minimally impacts unweighted  $\beta$ -diversity comparisons of gradient communities. Unweighted UniFrac PCoA plots comparing bacterial communities of spontaneous beer fermentations (dataset 9) with different filter settings. Row label indicates variable filter setting tested. Labels above plots indicate parameter setting. All other variables held constant to QIIME v1.4.0 defaults ( $r = 1$ ;  $n = 0$ ;  $p = 75$  bp;  $q = 3$ ). Note that  $p$  represents an absolute value (in nucleotides) in this figure, 150 nt being the maximum read length.

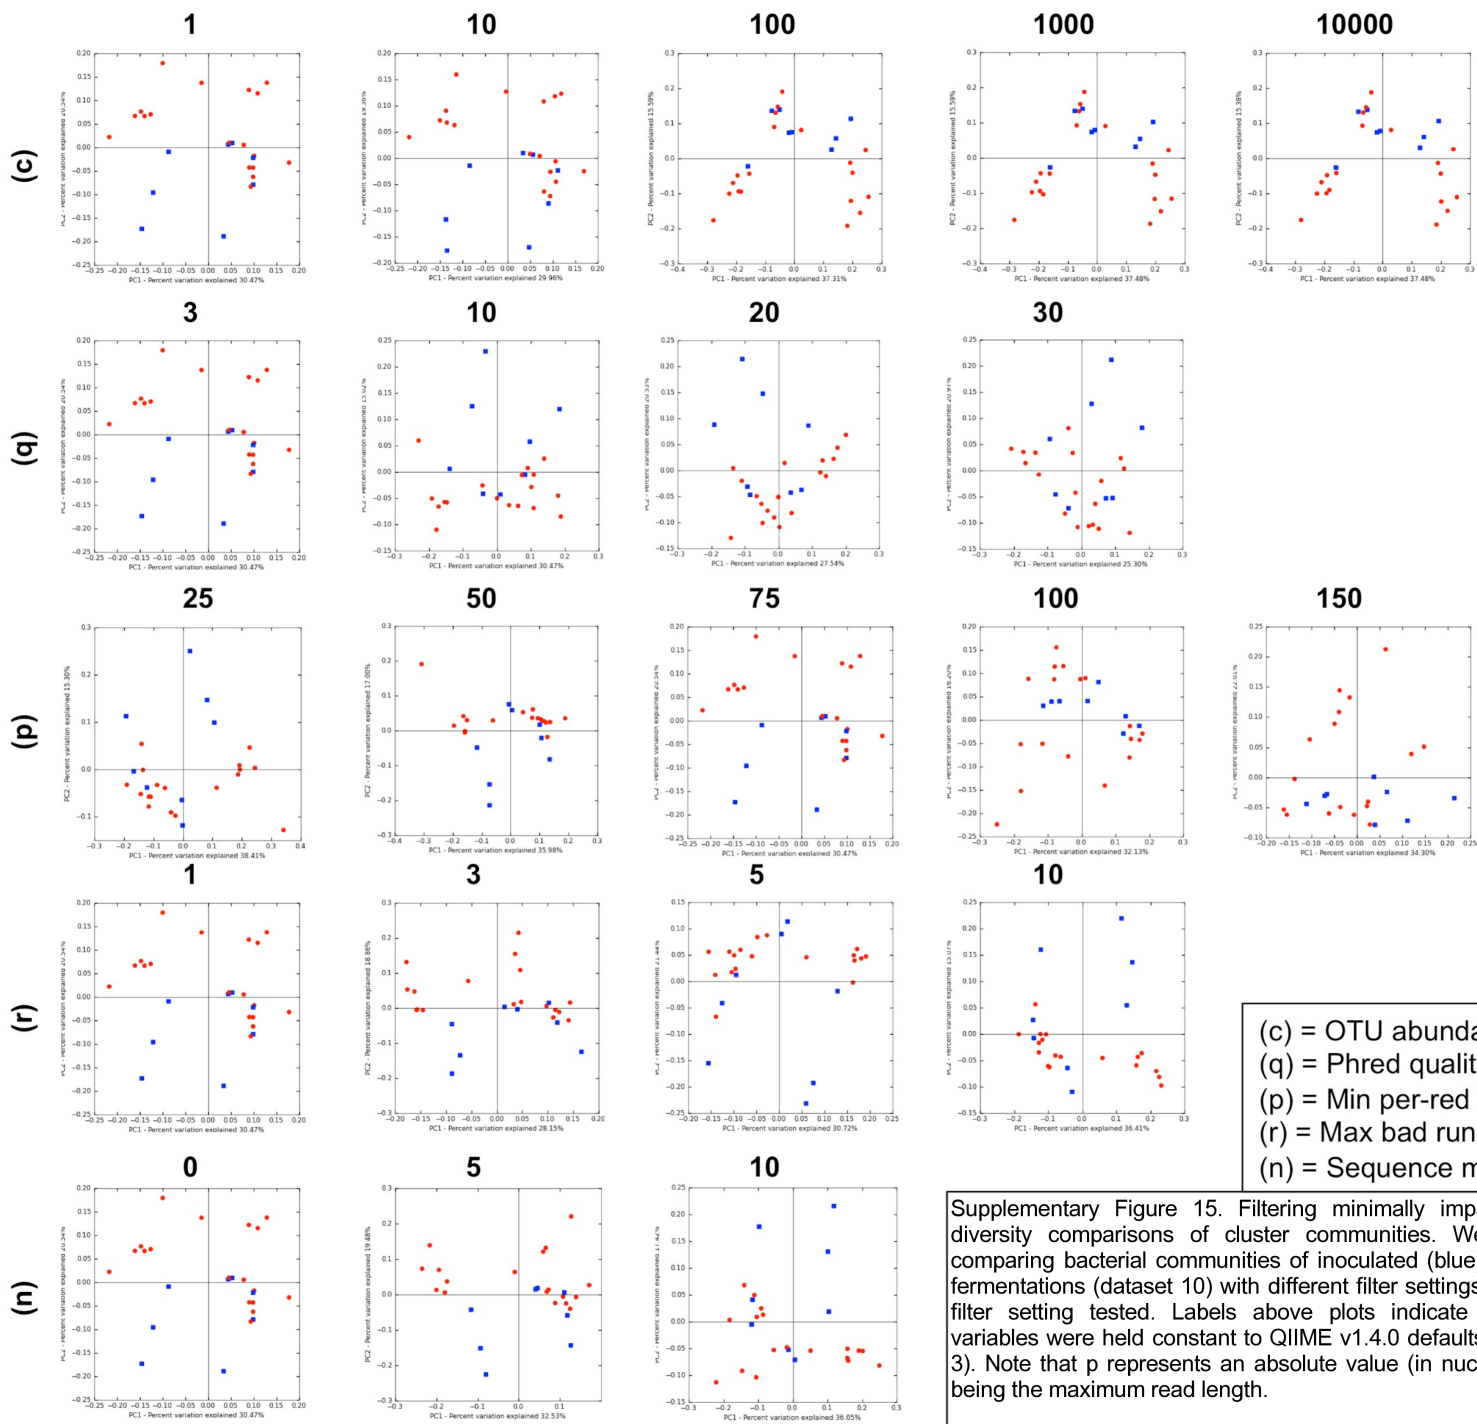

Supplementary Figure 15. Filtering minimally impacts abundance-weighted  $\beta$ -diversity comparisons of cluster communities. Weighted UniFrac PCoA plots comparing bacterial communities of inoculated (blue) and uninoculated (red) wine fermentations (dataset 10) with different filter settings. Row label indicates variable filter setting tested. Labels above plots indicate parameter setting. All other variables were held constant to QIIME v1.4.0 defaults ( $r = 1$ ;  $n = 0$ ;  $p = 75$  bp;  $q = 3$ ). Note that p represents an absolute value (in nucleotides) in this figure, 150 nt being the maximum read length.

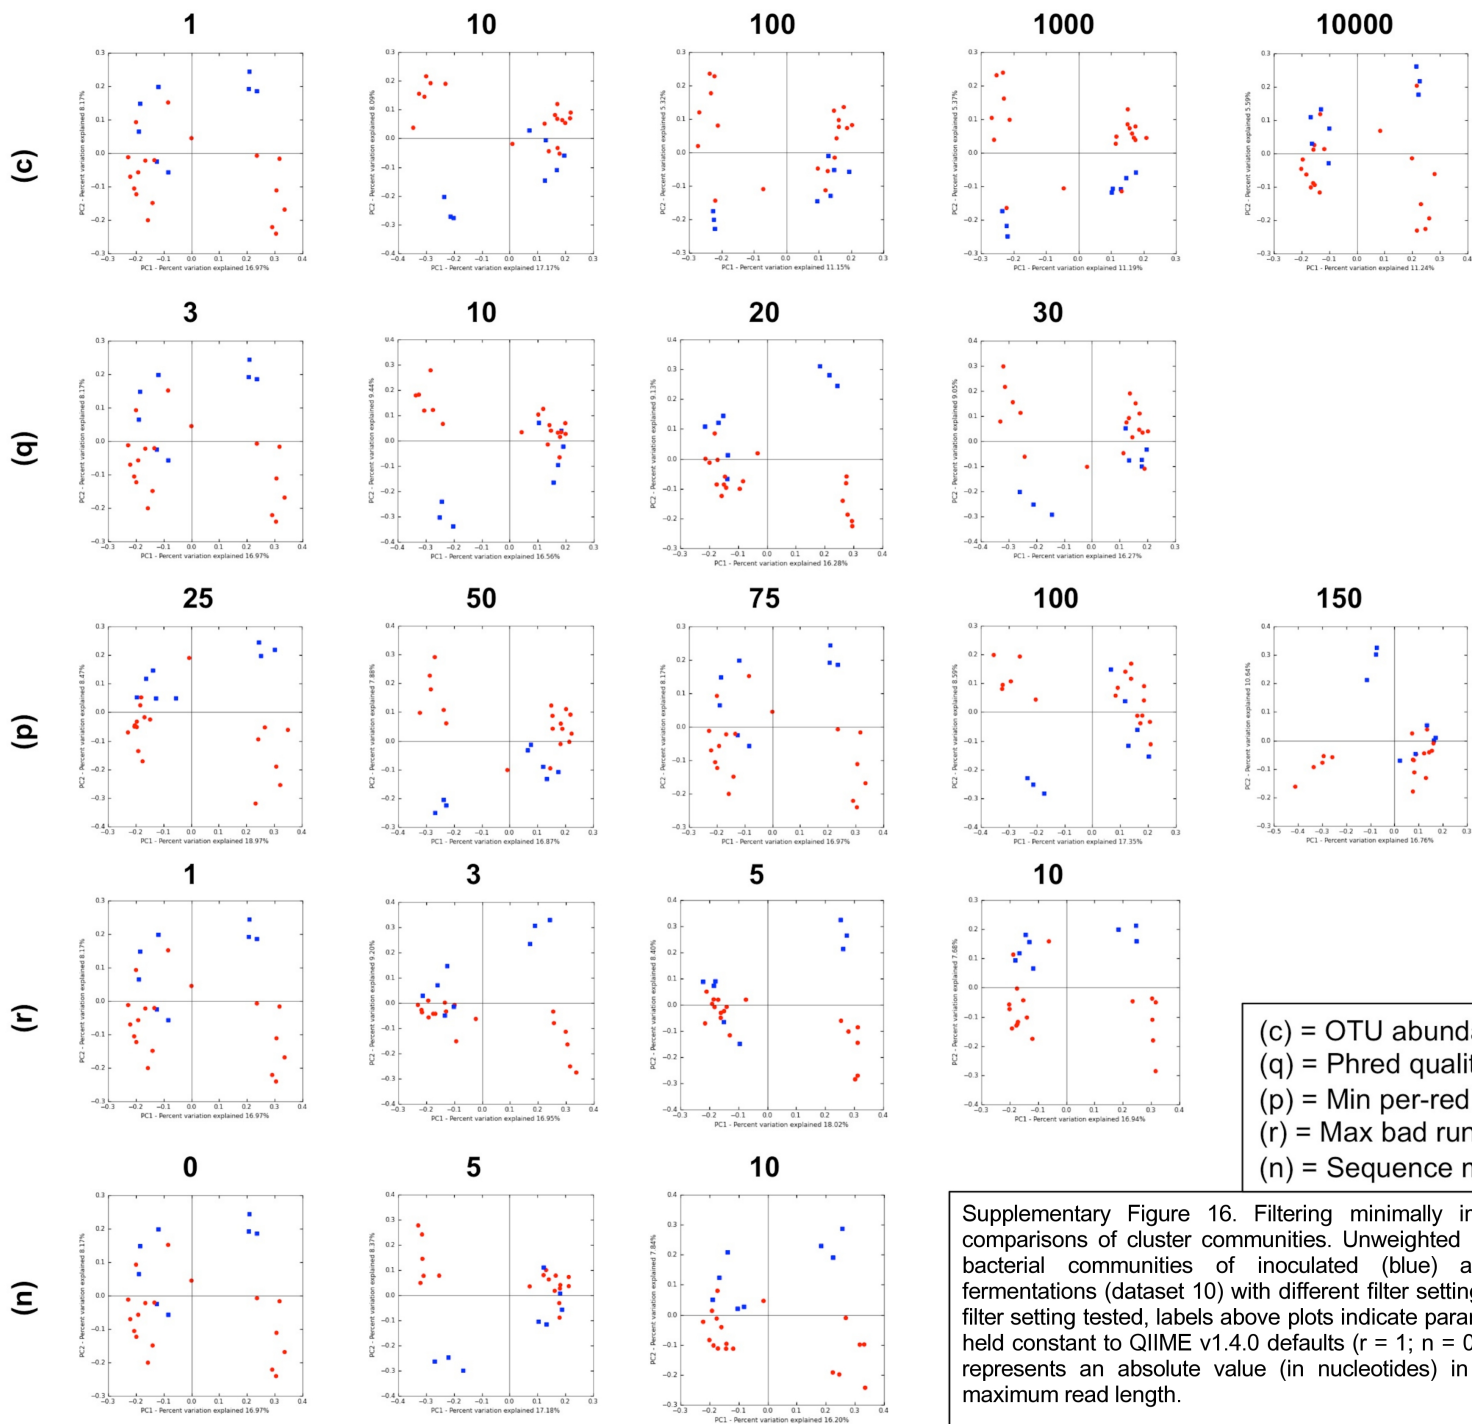

(c) = OTU abundance threshold  
(q) = Phred quality score threshold  
(p) = Min per-read length  
(r) = Max bad run length  
(n) = Sequence max N

Supplementary Figure 16. Filtering minimally impacts unweighted  $\beta$ -diversity comparisons of cluster communities. Unweighted UniFrac PCoA plots comparing bacterial communities of inoculated (blue) and uninoculated (red) wine fermentations (dataset 10) with different filter settings. Row label indicates variable filter setting tested, labels above plots indicate parameter setting. All other variables held constant to QIIME v1.4.0 defaults ( $r = 1$ ;  $n = 0$ ;  $p = 75$  bp;  $q = 3$ ). Note that  $p$  represents an absolute value (in nucleotides) in this figure, 150 nt being the maximum read length.



Supplementary Table 1. Parameter values and cross-interactions tested in this study.

| phred_quality_score (q) | filter_otu_table.py min count (c) | sequence_max_n (n) | max_bad_run_length (r; default 1)   |     |     |     |     |     |    |    |    |     |    |    |    |     |    |    |    |     |    |    |    |     |   |  |
|-------------------------|-----------------------------------|--------------------|-------------------------------------|-----|-----|-----|-----|-----|----|----|----|-----|----|----|----|-----|----|----|----|-----|----|----|----|-----|---|--|
|                         |                                   |                    | 1                                   |     |     |     |     |     |    |    | 2  |     |    |    | 3  |     |    |    | 5  |     |    |    | 10 |     |   |  |
|                         |                                   |                    | min_per_read_length (p; default 75) |     |     |     |     |     |    |    |    |     |    |    |    |     |    |    |    |     |    |    |    |     |   |  |
| 25                      | 50                                | 75                 | 90                                  | 100 | 110 | 150 | 200 | 250 | 25 | 50 | 75 | 100 | 25 | 50 | 75 | 100 | 25 | 50 | 75 | 100 | 25 | 50 | 75 | 100 |   |  |
| default (3)             | 1 (default)                       | default (0)        | X                                   | X   | X   | X   | X   | X   | X  | X  | X  | X   | X  | X  | X  | X   | X  | X  | X  | X   | X  | X  | X  | X   | X |  |
|                         |                                   | 1                  | X                                   | X   | X   | X   | X   | X   | X  | X  | X  | X   | X  | X  | X  | X   | X  | X  | X  | X   | X  | X  | X  | X   | X |  |
|                         |                                   | 3                  | X                                   | X   | X   | X   | X   | X   | X  | X  | X  | X   | X  | X  | X  | X   | X  | X  | X  | X   | X  | X  | X  | X   | X |  |
|                         |                                   | 5                  | X                                   | X   | X   | X   | X   | X   | X  | X  | X  | X   | X  | X  | X  | X   | X  | X  | X  | X   | X  | X  | X  | X   | X |  |
|                         |                                   | 10                 | X                                   | X   | X   | X   | X   | X   | X  | X  | X  | X   | X  | X  | X  | X   | X  | X  | X  | X   | X  | X  | X  | X   | X |  |
|                         | 10                                | default (0)        | X                                   | X   | X   | X   | X   | X   | X  | X  | X  | X   | X  | X  | X  | X   | X  | X  | X  | X   | X  | X  | X  | X   | X |  |
|                         |                                   | 1                  | X                                   | X   | X   | X   | X   | X   | X  | X  | X  | X   | X  | X  | X  | X   | X  | X  | X  | X   | X  | X  | X  | X   | X |  |
|                         |                                   | 3                  | X                                   | X   | X   | X   | X   | X   | X  | X  | X  | X   | X  | X  | X  | X   | X  | X  | X  | X   | X  | X  | X  | X   | X |  |
|                         |                                   | 5                  | X                                   | X   | X   | X   | X   | X   | X  | X  | X  | X   | X  | X  | X  | X   | X  | X  | X  | X   | X  | X  | X  | X   | X |  |
|                         |                                   | 10                 | X                                   | X   | X   | X   | X   | X   | X  | X  | X  | X   | X  | X  | X  | X   | X  | X  | X  | X   | X  | X  | X  | X   | X |  |
|                         | 100                               | default (0)        | X                                   | X   | X   | X   | X   | X   | X  | X  | X  | X   | X  | X  | X  | X   | X  | X  | X  | X   | X  | X  | X  | X   | X |  |
|                         |                                   | 1                  | X                                   | X   | X   | X   | X   | X   | X  | X  | X  | X   | X  | X  | X  | X   | X  | X  | X  | X   | X  | X  | X  | X   | X |  |
|                         |                                   | 3                  | X                                   | X   | X   | X   | X   | X   | X  | X  | X  | X   | X  | X  | X  | X   | X  | X  | X  | X   | X  | X  | X  | X   | X |  |
|                         |                                   | 5                  | X                                   | X   | X   | X   | X   | X   | X  | X  | X  | X   | X  | X  | X  | X   | X  | X  | X  | X   | X  | X  | X  | X   | X |  |
|                         |                                   | 10                 | X                                   | X   | X   | X   | X   | X   | X  | X  | X  | X   | X  | X  | X  | X   | X  | X  | X  | X   | X  | X  | X  | X   | X |  |
|                         | 1000                              | default (0)        | X                                   | X   | X   | X   | X   | X   | X  | X  | X  | X   | X  | X  | X  | X   | X  | X  | X  | X   | X  | X  | X  | X   | X |  |
| 1                       |                                   | X                  | X                                   | X   | X   | X   | X   | X   | X  | X  | X  | X   | X  | X  | X  | X   | X  | X  | X  | X   | X  | X  | X  | X   |   |  |
| 3                       |                                   | X                  | X                                   | X   | X   | X   | X   | X   | X  | X  | X  | X   | X  | X  | X  | X   | X  | X  | X  | X   | X  | X  | X  | X   |   |  |
| 5                       |                                   | X                  | X                                   | X   | X   | X   | X   | X   | X  | X  | X  | X   | X  | X  | X  | X   | X  | X  | X  | X   | X  | X  | X  | X   |   |  |
| 10                      |                                   | X                  | X                                   | X   | X   | X   | X   | X   | X  | X  | X  | X   | X  | X  | X  | X   | X  | X  | X  | X   | X  | X  | X  | X   |   |  |
| 10                      | 1 (default)                       |                    |                                     | X   |     |     |     |     |    |    |    |     |    |    |    |     |    |    |    |     |    |    |    |     |   |  |
|                         | 10                                |                    |                                     | X   |     |     |     |     |    |    |    |     |    |    |    |     |    |    |    |     |    |    |    |     |   |  |
|                         | 100                               |                    |                                     | X   |     |     |     |     |    |    |    |     |    |    |    |     |    |    |    |     |    |    |    |     |   |  |
|                         | 1000                              |                    |                                     | X   |     |     |     |     |    |    |    |     |    |    |    |     |    |    |    |     |    |    |    |     |   |  |
|                         | 10000                             |                    |                                     | X   |     |     |     |     |    |    |    |     |    |    |    |     |    |    |    |     |    |    |    |     |   |  |
| 20                      | 1 (default)                       |                    |                                     | X   |     |     |     |     |    |    |    |     |    |    |    |     |    |    |    |     |    |    |    |     |   |  |
|                         | 10                                |                    |                                     | X   |     |     |     |     |    |    |    |     |    |    |    |     |    |    |    |     |    |    |    |     |   |  |
|                         | 100                               |                    |                                     | X   |     |     |     |     |    |    |    |     |    |    |    |     |    |    |    |     |    |    |    |     |   |  |
|                         | 1000                              |                    |                                     | X   |     |     |     |     |    |    |    |     |    |    |    |     |    |    |    |     |    |    |    |     |   |  |
|                         | 10000                             |                    |                                     | X   |     |     |     |     |    |    |    |     |    |    |    |     |    |    |    |     |    |    |    |     |   |  |
| 30                      | 1 (default)                       |                    |                                     | X   |     |     |     |     |    |    |    |     |    |    |    |     |    |    |    |     |    |    |    |     |   |  |
|                         | 10                                |                    |                                     | X   |     |     |     |     |    |    |    |     |    |    |    |     |    |    |    |     |    |    |    |     |   |  |
|                         | 100                               |                    |                                     | X   |     |     |     |     |    |    |    |     |    |    |    |     |    |    |    |     |    |    |    |     |   |  |
|                         | 1000                              |                    |                                     | X   |     |     |     |     |    |    |    |     |    |    |    |     |    |    |    |     |    |    |    |     |   |  |
|                         | 10000                             |                    |                                     | X   |     |     |     |     |    |    |    |     |    |    |    |     |    |    |    |     |    |    |    |     |   |  |

| KEY |                        |
|-----|------------------------|
| X   | GAIx                   |
| X   | MiSeq                  |
| X   | HiSeq                  |
| X   | GAIx, HiSeq, and MiSeq |

**Supplementary Table 2. Mock Communities Analyzed in This Study.**

| Dataset | Target Gene | Sequencing Platform | Read length (nt) | Mock Communities <sup>a</sup> | Community ID <sup>b</sup> | Total Families | Total Genera | Total Species | Total Strains |
|---------|-------------|---------------------|------------------|-------------------------------|---------------------------|----------------|--------------|---------------|---------------|
| 1       | 16S rRNA    | GAllx               | 100              | 3 even                        | A                         | 16             | 29           | 67            | 67            |
| 2       | 16S rRNA    | MiSeq               | 250              | 2 even 2 uneven               | B                         | 19             | 19           | 22            | 22            |
| 3       | 16S rRNA    | MiSeq               | 150              | 2 even 2 uneven               | B                         | 19             | 19           | 22            | 22            |
| 4       | 18S rRNA    | HiSeq               | 90               | 1 even                        | C                         | 8              | 10           | 12            | 12            |
| 5       | 16S rRNA    | HiSeq               | 100              | 1 even                        | D                         | 13             | 23           | 44            | 48            |
| 6       | 16S rRNA    | MiSeq               | 150              | 1 even                        | D                         | 13             | 23           | 44            | 48            |

<sup>a</sup>Number of mock communities analyzed in this run

<sup>b</sup>Community ID corresponds to the four different mock communities described in Table S3-S6

### Supplementary Table 3. Composition of Mock Community A.

| Taxon                                                                                                                                               | Even1  | Even2  | Even3  |
|-----------------------------------------------------------------------------------------------------------------------------------------------------|--------|--------|--------|
| Actinobacteria; Actinobacteria (class); Actinobacteridae; Bifidobacteriales;Bifidobacteriaceae; Bifidobacterium;Bifidobacterium adolescentis        | 0.0147 | 0.0147 | 0.0147 |
| Actinobacteria; Actinobacteria (class); Actinobacteridae; Bifidobacteriales;Bifidobacteriaceae; Bifidobacterium;Bifidobacterium angulatum           | 0.0147 | 0.0147 | 0.0147 |
| Actinobacteria; Actinobacteria (class); Actinobacteridae; Bifidobacteriales;Bifidobacteriaceae; Bifidobacterium;Bifidobacterium bifidum             | 0.0147 | 0.0147 | 0.0147 |
| Actinobacteria; Actinobacteria (class); Actinobacteridae; Bifidobacteriales;Bifidobacteriaceae; Bifidobacterium;Bifidobacterium breve               | 0.0147 | 0.0147 | 0.0147 |
| Actinobacteria; Actinobacteria (class); Actinobacteridae; Bifidobacteriales;Bifidobacteriaceae; Bifidobacterium;Bifidobacterium catenulatum         | 0.0147 | 0.0147 | 0.0147 |
| Actinobacteria; Actinobacteria (class); Actinobacteridae; Bifidobacteriales;Bifidobacteriaceae; Bifidobacterium;Bifidobacterium dentium             | 0.0147 | 0.0147 | 0.0147 |
| Actinobacteria; Actinobacteria (class); Actinobacteridae; Bifidobacteriales;Bifidobacteriaceae; Bifidobacterium;Bifidobacterium gallicum            | 0.0147 | 0.0147 | 0.0147 |
| Actinobacteria; Actinobacteria (class); Actinobacteridae; Bifidobacteriales;Bifidobacteriaceae; Bifidobacterium;Bifidobacterium pseudocatenulatum   | 0.0147 | 0.0147 | 0.0147 |
| Actinobacteria; Actinobacteria (class); Coriobacteridae; Coriobacteriales;Coriobacterineae; Coriobacteriaceae; Collinsella;Collinsella intestinalis | 0.0147 | 0.0147 | 0.0147 |
| Actinobacteria; Actinobacteria (class); Coriobacteridae; Coriobacteriales;Coriobacterineae; Coriobacteriaceae; Collinsella;Collinsella stercoris    | 0.0147 | 0.0147 | 0.0147 |
| Bacteroidetes/Chlorobi group; Bacteroidetes; Bacteroidia; Bacteroidales;Bacteroidaceae; Bacteroides;Bacteroides caccae                              | 0.0147 | 0.0147 | 0.0147 |
| Bacteroidetes/Chlorobi group; Bacteroidetes; Bacteroidia; Bacteroidales;Bacteroidaceae; Bacteroides;Bacteroides cellulosilyticus                    | 0.0147 | 0.0147 | 0.0147 |
| Bacteroidetes/Chlorobi group; Bacteroidetes; Bacteroidia; Bacteroidales;Bacteroidaceae; Bacteroides;Bacteroides coprocola                           | 0.0147 | 0.0147 | 0.0147 |
| Bacteroidetes/Chlorobi group; Bacteroidetes; Bacteroidia; Bacteroidales;Bacteroidaceae; Bacteroides;Bacteroides coprophilus                         | 0.0147 | 0.0147 | 0.0147 |
| Bacteroidetes/Chlorobi group; Bacteroidetes; Bacteroidia; Bacteroidales;Bacteroidaceae; Bacteroides;Bacteroides dorei                               | 0.0147 | 0.0147 | 0.0147 |
| Bacteroidetes/Chlorobi group; Bacteroidetes; Bacteroidia; Bacteroidales;Bacteroidaceae; Bacteroides;Bacteroides eggerthii                           | 0.0147 | 0.0147 | 0.0147 |
| Bacteroidetes/Chlorobi group; Bacteroidetes; Bacteroidia; Bacteroidales;Bacteroidaceae; Bacteroides;Bacteroides finegoldii                          | 0.0147 | 0.0147 | 0.0147 |
| Bacteroidetes/Chlorobi group; Bacteroidetes; Bacteroidia; Bacteroidales;Bacteroidaceae; Bacteroides;Bacteroides intestinalis                        | 0.0147 | 0.0147 | 0.0147 |
| Bacteroidetes/Chlorobi group; Bacteroidetes; Bacteroidia; Bacteroidales;Bacteroidaceae; Bacteroides;Bacteroides ovatus                              | 0.0147 | 0.0147 | 0.0147 |
| Bacteroidetes/Chlorobi group; Bacteroidetes; Bacteroidia; Bacteroidales;Bacteroidaceae; Bacteroides;Bacteroides pectinophilus                       | 0.0147 | 0.0147 | 0.0147 |
| Bacteroidetes/Chlorobi group; Bacteroidetes; Bacteroidia; Bacteroidales;Bacteroidaceae; Bacteroides;Bacteroides plebeius                            | 0.0147 | 0.0147 | 0.0147 |
| Bacteroidetes/Chlorobi group; Bacteroidetes; Bacteroidia; Bacteroidales;Bacteroidaceae; Bacteroides;Bacteroides stercoris                           | 0.0147 | 0.0147 | 0.0147 |
| Bacteroidetes/Chlorobi group; Bacteroidetes; Bacteroidia; Bacteroidales;Porphyromonadaceae; Parabacteroides;Parabacteroides johnsonii               | 0.0147 | 0.0147 | 0.0147 |
| Bacteroidetes/Chlorobi group; Bacteroidetes; Bacteroidia; Bacteroidales;Porphyromonadaceae; Parabacteroides;Prevotella copri                        | 0.0147 | 0.0147 | 0.0147 |
| Bacteroidetes/Chlorobi group; Bacteroidetes; Bacteroidia; Bacteroidales;Rikenellaceae; Alistipes;Alistipes putredinis                               | 0.0147 | 0.0147 | 0.0147 |
| Firmicutes; Bacilli; Lactobacillales; Streptococcaceae; Streptococcus;Streptococcus infantarius                                                     | 0.0147 | 0.0147 | 0.0147 |
| Firmicutes; Clostridia; Clostridiales; Clostridiaceae; Clostridium;Clostridium asparagiforme                                                        | 0.0147 | 0.0147 | 0.0147 |
| Firmicutes; Clostridia; Clostridiales; Clostridiaceae; Clostridium;Clostridium bartlettii                                                           | 0.0147 | 0.0147 | 0.0147 |
| Firmicutes; Clostridia; Clostridiales; Clostridiaceae; Clostridium;Clostridium celatum                                                              | 0.0147 | 0.0147 | 0.0147 |
| Firmicutes; Clostridia; Clostridiales; Clostridiaceae; Clostridium;Clostridium hathewayi                                                            | 0.0147 | 0.0147 | 0.0147 |
| Firmicutes; Clostridia; Clostridiales; Clostridiaceae; Clostridium;Clostridium hiranonis                                                            | 0.0147 | 0.0147 | 0.0147 |
| Firmicutes; Clostridia; Clostridiales; Clostridiaceae; Clostridium;Clostridium hylemonae                                                            | 0.0147 | 0.0147 | 0.0147 |
| Firmicutes; Clostridia; Clostridiales; Clostridiaceae; Clostridium;Clostridium methylpentosum                                                       | 0.0147 | 0.0147 | 0.0147 |
| Firmicutes; Clostridia; Clostridiales; Clostridiaceae; Clostridium;Clostridium nexile                                                               | 0.0147 | 0.0147 | 0.0147 |
| Firmicutes; Clostridia; Clostridiales; Clostridiaceae; Clostridium;Clostridium orbiscindens                                                         | 0.0147 | 0.0147 | 0.0147 |
| Firmicutes; Clostridia; Clostridiales; Clostridiaceae; Clostridium;Clostridium ramosum                                                              | 0.0147 | 0.0147 | 0.0147 |
| Firmicutes; Clostridia; Clostridiales; Clostridiaceae; Clostridium;Clostridium saccharolyticum-related                                              | 0.0147 | 0.0147 | 0.0147 |
| Firmicutes; Clostridia; Clostridiales; Clostridiaceae; Clostridium;Clostridium sporogenes                                                           | 0.0147 | 0.0147 | 0.0147 |



|                                                                                                                                                      |        |        |        |
|------------------------------------------------------------------------------------------------------------------------------------------------------|--------|--------|--------|
| Firmicutes; Clostridia; Clostridiales; Clostridiales incertae sedis; Clostridiales Family XI. Incertae Sedis; Anaerococcus;Anaerococcus hydrogenalis | 0.0147 | 0.0147 | 0.0147 |
| Firmicutes; Clostridia; Clostridiales; Eubacteriaceae; Anaerofustis;Anaerofustis stercorihominis                                                     | 0.0147 | 0.0147 | 0.0147 |
| Firmicutes; Clostridia; Clostridiales; Eubacteriaceae; Eubacterium;Eubacterium biforme                                                               | 0.0147 | 0.0147 | 0.0147 |
| Firmicutes; Clostridia; Clostridiales; Eubacteriaceae; Eubacterium;Eubacterium ramulus                                                               | 0.0147 | 0.0147 | 0.0147 |
| Firmicutes; Clostridia; Clostridiales; Lachnospiraceae; Butyrivibrio;Butyrivibrio crossotus                                                          | 0.0147 | 0.0147 | 0.0147 |
| Firmicutes; Clostridia; Clostridiales; Lachnospiraceae; Coprococcus;Coprococcus comes                                                                | 0.0147 | 0.0147 | 0.0147 |
| Firmicutes; Clostridia; Clostridiales; Lachnospiraceae; Dorea;Dorea formicigenerans                                                                  | 0.0147 | 0.0147 | 0.0147 |
| Firmicutes; Clostridia; Clostridiales; Lachnospiraceae; Roseburia;Roseburia faecis                                                                   | 0.0147 | 0.0147 | 0.0147 |
| Firmicutes; Clostridia; Clostridiales; Lachnospiraceae; Roseburia;Roseburia intestinalis                                                             | 0.0147 | 0.0147 | 0.0147 |
| Firmicutes; Clostridia; Clostridiales; Lachnospiraceae; Roseburia;Roseburia inulinivorans                                                            | 0.0147 | 0.0147 | 0.0147 |
| Firmicutes; Clostridia; Clostridiales; Ruminococcaceae; Anaerotruncus;Anaerotruncus colihominis                                                      | 0.0147 | 0.0147 | 0.0147 |
| Firmicutes; Clostridia; Clostridiales; Ruminococcaceae; Ruminococcus;Ruminococcus gnavus                                                             | 0.0147 | 0.0147 | 0.0147 |
| Firmicutes; Clostridia; Clostridiales; Ruminococcaceae; Ruminococcus;Ruminococcus hansenii                                                           | 0.0147 | 0.0147 | 0.0147 |
| Firmicutes; Clostridia; Clostridiales; Ruminococcaceae; Ruminococcus;Ruminococcus lactaris                                                           | 0.0147 | 0.0147 | 0.0147 |
| Firmicutes; Clostridia; Clostridiales; Ruminococcaceae; Ruminococcus;Ruminococcus torques                                                            | 0.0147 | 0.0147 | 0.0147 |
| Firmicutes; Clostridia; Clostridiales; Ruminococcaceae; Subdoligranulum;Subdoligranulum variabile                                                    | 0.0147 | 0.0147 | 0.0147 |
| Firmicutes; Clostridia; Clostridiales; Veillonellaceae; Mitsuoella;Mitsuoella multacida                                                              | 0.0147 | 0.0147 | 0.0147 |
| Firmicutes; Erysipelotrichi; Erysipelotrichales; Erysipelotrichaceae; Catenibacterium;Catenibacterium mitsuokai                                      | 0.0294 | 0.0294 | 0.0294 |
| Firmicutes; Erysipelotrichi; Erysipelotrichales; Erysipelotrichaceae; Holdemania;Holdemania filiformis                                               | 0.0147 | 0.0147 | 0.0147 |
| Firmicutes; Clostridia; Clostridiales; Peptococcaceae; Desulfotobacterium;Desulfotobacterium_hafniense                                               | 0.0147 | 0.0147 | 0.0147 |
| Proteobacteria; Gammaproteobacteria; Enterobacteriales; Enterobacteriaceae; Proteus;Proteus penneri                                                  | 0.0147 | 0.0147 | 0.0147 |
| Proteobacteria; Gammaproteobacteria; Enterobacteriales; Enterobacteriaceae; Cedecea;Cedecea davisae                                                  | 0.0147 | 0.0147 | 0.0147 |
| Proteobacteria; Gammaproteobacteria; Enterobacteriales; Enterobacteriaceae; Citrobacter;Citrobacter sp                                               | 0.0147 | 0.0147 | 0.0147 |
| Proteobacteria; Gammaproteobacteria; Enterobacteriales; Enterobacteriaceae; Edwardsiella;Edwardsiella tarda                                          | 0.0147 | 0.0147 | 0.0147 |
| Proteobacteria; Gammaproteobacteria; Enterobacteriales; Enterobacteriaceae; Enterobacter;Enterobacter cancerogenus                                   | 0.0147 | 0.0147 | 0.0147 |
| Proteobacteria; Gammaproteobacteria; Enterobacteriales; Enterobacteriaceae; Providencia;Providencia alcalifaciens                                    | 0.0147 | 0.0147 | 0.0147 |
| Proteobacteria; Gammaproteobacteria; Enterobacteriales; Enterobacteriaceae; Providencia;Providencia rettgeri                                         | 0.0147 | 0.0147 | 0.0147 |
| Proteobacteria; Gammaproteobacteria; Enterobacteriales; Enterobacteriaceae; Providencia;Providencia rustigianii                                      | 0.0147 | 0.0147 | 0.0147 |
| Proteobacteria; Gammaproteobacteria; Enterobacteriales; Enterobacteriaceae; Providencia;Providencia stuartii                                         | 0.0147 | 0.0147 | 0.0147 |

**Supplementary Table 4. Composition of Mock Community B.**

| Taxon                                                                                                                          | Even   | Staggered |
|--------------------------------------------------------------------------------------------------------------------------------|--------|-----------|
| Bacteria;Actinobacteria;Actinobacteria;Actinomycetales;Actinomycetaceae;Actinomyces;Actinomyces odontolyticus ATCC 17982       | 0.0476 | 0.0002    |
| Bacteria;Actinobacteria;Actinobacteria;Actinomycetales;Propionibacteriaceae;Propionibacterium;Propionibacterium acnes DSM16379 | 0.0476 | 0.0021    |
| Bacteria;Bacteroidetes;Bacteroidia;Bacteroidales;Bacteroidaceae;Bacteroides;Bacteroides vulgatus ATCC 8482                     | 0.0476 | 0.0002    |
| Bacteria;Deinococcus-thermus;Deinococci;Deinococcales;Deinococcaceae;Deinococcus;Deinococcus radiodurans DSM 20539             | 0.0476 | 0.0002    |
| Bacteria;Firmicutes;Bacilli;Bacillales;Bacillaceae;Bacillus;Bacillus cereus ATCC 10987                                         | 0.0476 | 0.0214    |
| Bacteria;Firmicutes;Bacilli;Bacillales;Listeriaceae;Listeria;Listeria monocytogenes ATCC BAA-679                               | 0.0476 | 0.0021    |
| Bacteria;Firmicutes;Bacilli;Bacillales;Staphylococcaceae;Staphylococcus;Staphylococcus aureus ATCC BAA-1718                    | 0.0476 | 0.2143    |
| Bacteria;Firmicutes;Bacilli;Bacillales;Staphylococcaceae;Staphylococcus;Staphylococcus epidermidis ATCC 12228                  | 0.0476 | 0.0214    |
| Bacteria;Firmicutes;Bacilli;Lactobacillales;Enterococcaceae;Enterococcus;Enterococcus faecalis ATCC 47077                      | 0.0476 | 0.0002    |
| Bacteria;Firmicutes;Bacilli;Lactobacillales;Lactobacillaceae;Lactobacillus;Lactobacillus gasseri DSM 20243                     | 0.0476 | 0.0021    |
| Bacteria;Firmicutes;Bacilli;Lactobacillales;Streptococcaceae;Streptococcus;Streptococcus agalactiae ATCC BAA-611               | 0.0476 | 0.2143    |
| Bacteria;Firmicutes;Bacilli;Lactobacillales;Streptococcaceae;Streptococcus;Streptococcus mutans ATCC 700610                    | 0.0476 | 0.0002    |
| Bacteria;Firmicutes;Bacilli;Lactobacillales;Streptococcaceae;Streptococcus;Streptococcus pneumoniae ATCC BAA-334               | 0.0476 | 0.0214    |
| Bacteria;Firmicutes;Clostridia;Clostridiales;Clostridiaceae;Clostridium;Clostridium beijerinckii ATCC 51743                    | 0.0476 | 0.0214    |
| Bacteria;Proteobacteria;Alphaproteobacteria;Rhodobacterales;Rhodobacteraceae;Rhodobacter;Rhodobacter sphaeroides ATCC 17023    | 0.0476 | 0.0214    |
| Bacteria;Proteobacteria;Betaproteobacteria;Neisseriales;Neisseriaceae;Neisseria;Neisseria meningitidis ATCC BAA-335            | 0.0476 | 0.0021    |
| Bacteria;Proteobacteria;Epsilonproteobacteria;Campylobacterales;Helicobacteraceae;Helicobacter;Helicobacter pylori ATCC 700392 | 0.0476 | 0.0021    |
| Bacteria;Proteobacteria;Gammaproteobacteria;Enterobacteriales;Enterobacteriaceae;Escherichia;Escherichia coli ATCC 700926      | 0.0476 | 0.2143    |
| Bacteria;Proteobacteria;Gammaproteobacteria;Pseudomonadales;Moraxellaceae;Acinetobacter;Acinetobacter baumannii ATCC 17978     | 0.0476 | 0.0021    |
| Bacteria;Proteobacteria;Gammaproteobacteria;Pseudomonadales;Pseudomonadaceae;Pseudomonas;Pseudomonas aeruginosa ATCC 47085     | 0.0476 | 0.0214    |
| Eukaryota;Fungi;Ascomycota;Saccharomycetes;Saccharomycetales;Incertae_sedis;Candida;Candida albicans ATCC MY-2876              | 0.0005 | 0.0002    |
| Euryarchaeota;Methanobacteria;Methanobacteriales;Methanobacteriaceae;Methanobrevibacter;Methanobrevibacter smithii ATCC 35061  | 0.0476 | 0.2143    |

## Supplementary Table 5. Composition of Mock Community C.

| Taxon                                                                                                                                                      | Relative Abundance |
|------------------------------------------------------------------------------------------------------------------------------------------------------------|--------------------|
| Eukaryota;Fungi;Ascomycota;Eurotiomycetes;Onygenales;Arthrodermataceae;Trichophyton                                                                        | 0.0833             |
| Eukaryota;Fungi;Ascomycota;Eurotiomycetes;Onygenales;Onygenaceae;Coccidioides;Coccidioides_immitis                                                         | 0.0833             |
| Eukaryota;Fungi;Ascomycota;Saccharomycetes;Saccharomycetales;Incertae_sedis;Candida;Candida_albicans                                                       | 0.0833             |
| Eukaryota;Fungi;Ascomycota;Saccharomycetes;Saccharomycetales;Incertae_sedis;Candida;Candida_tropicalis                                                     | 0.0833             |
| Eukaryota;Fungi;Ascomycota;Saccharomycetes;Saccharomycetales;Saccharomycetaceae;Candida;Candida_lusitaniae                                                 | 0.0833             |
| Eukaryota;Fungi;Ascomycota;Saccharomycetes;Saccharomycetales;Saccharomycetaceae;Saccharomyces;Saccharomyces_cerevisiae                                     | 0.0833             |
| Eukaryota;Fungi;Ascomycota;Schizosaccharomycetes;Schizosaccharomycetales;Schizosaccharomycetaceae;Schizosaccharomyces;Schizosaccharomyces_pombe            | 0.0833             |
| Eukaryota;Fungi;Ascomycota;Sordariomycetes;Hypocreales;Nectriaceae;Fusarium;Fusarium_oxysporum                                                             | 0.0833             |
| Eukaryota;Fungi;Basidiomycota;Tremellomycetes;Tremellales;Tremellaceae;Cryptococcus;Cryptococcus_neoformans                                                | 0.0833             |
| Eukaryota;Fungi;Chytridiomycota;Chytridiomycetes;Rhizophydiales;Incertae_sedis;Batrachochytrium;Batrachochytrium_dendrobatidis                             | 0.0833             |
| Eukaryota;Fungi;Incertae_sedis;Incertae_sedis;Mucorales;Incertae_sedis;Rhizopus;Rhizopus_oryzae                                                            | 0.0833             |
| Eukaryota;Metazoa;Chordata;Craniata;Vertebrata;Euteleostomi;Mammalia;Eutheria;Euarchontoglires;Primates;Haplorrhini;Catarrhini;Hominidae;Homo;Homo sapiens | 0.0833             |

## Supplementary Table 6. Composition of Mock Community D.

| Taxon                                                                                                                                  | Relative Abundance |
|----------------------------------------------------------------------------------------------------------------------------------------|--------------------|
| Actinobacteria;Actinobacteria;Bifidobacteriales;Bifidobacteriaceae;Bifidobacterium;bifidum;Bifidobacterium bifidum                     | 0.0208             |
| Actinobacteria;Actinobacteria;Bifidobacteriales;Bifidobacteriaceae;Bifidobacterium;pseudocatenulatum;Bifidobacterium pseudocatenulatum | 0.0208             |
| Actinobacteria;Actinobacteria;Coriobacteriales;Coriobacteriaceae;Collinsella;intestinalis;Collinsella intestinalis                     | 0.0208             |
| Bacteroidetes;Bacteroidia;Bacteroidales;Bacteroidaceae;Bacteroides;cellulosilyticus;Bacteroides cellulosilyticus                       | 0.0208             |
| Bacteroidetes;Bacteroidia;Bacteroidales;Bacteroidaceae;Bacteroides;dorei;Bacteroides dorei                                             | 0.0208             |
| Bacteroidetes;Bacteroidia;Bacteroidales;Bacteroidaceae;Bacteroides;eggerthii;Bacteroides eggerthii                                     | 0.0208             |
| Bacteroidetes;Bacteroidia;Bacteroidales;Bacteroidaceae;Bacteroides;finnegoldii;Bacteroides finnegoldii                                 | 0.0208             |
| Bacteroidetes;Bacteroidia;Bacteroidales;Bacteroidaceae;Bacteroides;intestinalis;Bacteroides intestinalis                               | 0.0208             |
| Bacteroidetes;Bacteroidia;Bacteroidales;Bacteroidaceae;Bacteroides;ovatus;Bacteroides ovatus                                           | 0.0208             |
| Bacteroidetes;Bacteroidia;Bacteroidales;Bacteroidaceae;Bacteroides;thetaitaomicron 3731;Bacteroides thetaitaomicron 3731               | 0.0208             |
| Bacteroidetes;Bacteroidia;Bacteroidales;Bacteroidaceae;Bacteroides;thetaitaomicron 7330;Bacteroides thetaitaomicron 7330               | 0.0208             |
| Bacteroidetes;Bacteroidia;Bacteroidales;Bacteroidaceae;Bacteroides;thetaitaomicron VPI-5482;Bacteroides thetaitaomicron VPI-5482       | 0.0208             |
| Bacteroidetes;Bacteroidia;Bacteroidales;Bacteroidaceae;Bacteroides;uniformis;Bacteroides uniformis                                     | 0.0208             |
| Bacteroidetes;Bacteroidia;Bacteroidales;Bacteroidaceae;Bacteroides;vulgatus;Bacteroides vulgatus                                       | 0.0208             |
| Bacteroidetes;Bacteroidia;Bacteroidales;Bacteroidaceae;Bacteroides;xylanisolvans;Bacteroides xylanisolvans                             | 0.0208             |
| Bacteroidetes;Bacteroidia;Bacteroidales;Porphyromonadaceae;Parabacteroides;johnsonii;Parabacteroides johnsonii                         | 0.0208             |
| Bacteroidetes;Bacteroidia;Bacteroidales;Rikenellaceae;Alistipes;indistinctus;Alistipes indistinctus                                    | 0.0208             |
| Firmicute;Bacilli;Lactobacillales;Streptococcaceae;Streptococcus;infantarius;Streptococcus infantarius                                 | 0.0208             |
| Firmicute;Clostridia;Clostridiales;Clostridiaceae;Clostridium; leptum;Clostridium leptum                                               | 0.0208             |
| Firmicute;Clostridia;Clostridiales;Clostridiaceae;Clostridium; nexile-related A2-232;Clostridium nexile-related A2-232                 | 0.0208             |
| Firmicute;Clostridia;Clostridiales;Clostridiaceae;Clostridium;asparagiforme;Clostridium asparagiforme                                  | 0.0208             |
| Firmicute;Clostridia;Clostridiales;Clostridiaceae;Clostridium;hathewayi;Clostridium hathewayi                                          | 0.0208             |
| Firmicute;Clostridia;Clostridiales;Clostridiaceae;Clostridium;nexile;Clostridium nexile                                                | 0.0208             |
| Firmicute;Clostridia;Clostridiales;Clostridiaceae;Clostridium;saccharolyticum-related;Clostridium saccharolyticum-related              | 0.0208             |
| Firmicute;Clostridia;Clostridiales;Clostridiaceae;Clostridium;sporogenes;Clostridium sporogenes                                        | 0.0208             |
| Firmicute;Clostridia;Clostridiales;Clostridiales Family XI. Incertae Sedis;Anaerococcus;hydrogenalis;Anaerococcus hydrogenalis         | 0.0208             |
| Firmicute;Clostridia;Clostridiales;Eubacteriaceae;Eubacterium;biforme;Eubacterium biforme                                              | 0.0208             |
| Firmicute;Clostridia;Clostridiales;Eubacteriaceae;Eubacterium;eligens;Eubacterium eligens                                              | 0.0208             |
| Firmicute;Clostridia;Clostridiales;Eubacteriaceae;Eubacterium;ventriosum;Eubacterium ventriosum                                        | 0.0208             |
| Firmicute;Clostridia;Clostridiales;Lachnospiraceae;Blautia;hansenii;Blautia hansenii                                                   | 0.0208             |
| Firmicute;Clostridia;Clostridiales;Lachnospiraceae;Blautia;luti;Blautia luti                                                           | 0.0208             |
| Firmicute;Clostridia;Clostridiales;Lachnospiraceae;Coproccoccus;comes;Coproccoccus comes                                               | 0.0208             |
| Firmicute;Clostridia;Clostridiales;Lachnospiraceae;Dorea;formicigenerans;Dorea formicigenerans                                         | 0.0208             |
| Firmicute;Clostridia;Clostridiales;Lachnospiraceae;Dorea;longicatena;Dorea longicatena                                                 | 0.0208             |
| Firmicute;Clostridia;Clostridiales;Lachnospiraceae;Roseburia;intestinalis;Roseburia intestinalis                                       | 0.0208             |
| Firmicute;Clostridia;Clostridiales;Ruminococcaceae;Anaerotruncus;colihominis;Anaerotruncus colihominis                                 | 0.0208             |
| Firmicute;Clostridia;Clostridiales;Ruminococcaceae;Faecalibacterium;prausnitzii M21/2;Faecalibacterium prausnitzii M21/2               | 0.0208             |
| Firmicute;Clostridia;Clostridiales;Ruminococcaceae;Ruminococcus;gnavus;Ruminococcus gnavus                                             | 0.0208             |
| Firmicute;Clostridia;Clostridiales;Ruminococcaceae;Ruminococcus;lactaris;Ruminococcus lactaris                                         | 0.0208             |
| Firmicute;Clostridia;Clostridiales;Ruminococcaceae;Ruminococcus;torques;Ruminococcus torques                                           | 0.0208             |
| Firmicute;Clostridia;Clostridiales;Ruminococcaceae;Subdoligranulum;variable;Subdoligranulum variable                                   | 0.0208             |
| Proteobacteria;Gammaproteobacteria;Enterobacteriales;Enterobacteriaceae;Edwardsiella;tarda;Edwardsiella tarda                          | 0.0208             |
| Proteobacteria;Gammaproteobacteria;Enterobacteriales;Enterobacteriaceae;Enterobacter;cancerogenus;Enterobacter cancerogenus            | 0.0208             |
| Proteobacteria;Gammaproteobacteria;Enterobacteriales;Enterobacteriaceae;Escherichia;coli K12;Escherichia coli K12                      | 0.0208             |
| Proteobacteria;Gammaproteobacteria;Enterobacteriales;Enterobacteriaceae;Escherichia;fergusonii;Escherichia fergusonii                  | 0.0208             |
| Proteobacteria;Gammaproteobacteria;Enterobacteriales;Enterobacteriaceae;Proteus;penneri;Proteus penneri                                | 0.0208             |
| Proteobacteria;Gammaproteobacteria;Enterobacteriales;Enterobacteriaceae;Providencia;alcalifaciens;Providencia alcalifaciens            | 0.0208             |
| Verrucomicrobia;Verrucomicrobiae;Verrucomicrobiales;Verrucomicrobiaceae;Akkermansia;muciniphila;Akkermansia muciniphila                | 0.0208             |

**Supplementary Table 7. Raw Sequence Counts and Sample Counts for Datasets Analyzed in This Study.**

| <b>Dataset</b> | <b>Type<sup>a</sup></b> | <b>Platform</b> | <b>Read Length</b> | <b>Samples<sup>b</sup></b> | <b>Total<sup>c</sup></b> | <b>Seq Count<sup>d</sup></b> |
|----------------|-------------------------|-----------------|--------------------|----------------------------|--------------------------|------------------------------|
| 1              | M/B (HAFL)              | GAllx           | 100                | 28                         | 28                       | 11172089                     |
| 2              | M                       | MiSeq           | 250                | 4                          | 4                        | 5204783                      |
| 3              | M                       | MiSeq           | 150                | 4                          | 4                        | 7599016                      |
| 4              | M                       | HiSeq           | 90                 | 1                          | 389                      | 26792290                     |
| 5              | M                       | HiSeq           | 100                | 1                          | 411                      | 174076782                    |
| 6              | M                       | MiSeq           | 150                | 1                          | 5                        | 3060773                      |
| 7              | B (HAFL)                | HiSeq           | 100                | 25                         | 32                       | 49757529                     |
| 8              | B (HAFL)                | MiSeq           | 150                | 25                         | 32                       | 4920833                      |
| 9              | B (Beer)                | GAllx           | 150                | 14                         | 240                      | 27404059                     |
| 10             | B (Wine)                | GAllx           | 150                | 26                         | 246                      | 27836488                     |

<sup>a</sup> Sample types included in run: M = mock community; B = biological sample; HAFL = host-associated and free-living communities<sup>5,8</sup>; Wine = inoculated and native wine fermentation samples<sup>10</sup>; Beer = spontaneous American coolship ale fermentation samples<sup>9</sup>

<sup>b</sup> Number of uniquely barcoded samples analyzed from this run

<sup>c</sup> Total number of uniquely barcoded samples included in this sequencing run

<sup>d</sup> Number of raw sequences input to filtering pipeline











|                   |                         | <b>Feces</b> | <b>Freshwater</b> | <b>Creek</b> | <b>Mock</b> | <b>Ocean</b> | <b>Sediment</b> | <b>Skin</b> | <b>Soil</b> |
|-------------------|-------------------------|--------------|-------------------|--------------|-------------|--------------|-----------------|-------------|-------------|
| <b>r1n0p75q20</b> | <b>Freshwater</b>       | < 0.001      |                   |              |             |              |                 |             |             |
|                   | <b>Freshwater Creek</b> | < 0.001      | < 0.001           |              |             |              |                 |             |             |
|                   | <b>Mock</b>             | < 0.001      | < 0.001           | < 0.001      |             |              |                 |             |             |
|                   | <b>Ocean</b>            | < 0.001      | < 0.001           | < 0.001      | < 0.001     |              |                 |             |             |
|                   | <b>Sediment Estuary</b> | < 0.001      | < 0.001           | < 0.001      | < 0.001     | < 0.001      |                 |             |             |
|                   | <b>Skin</b>             | < 0.001      | < 0.001           | < 0.001      | < 0.001     | < 0.001      | < 0.001         |             |             |
|                   | <b>Soil</b>             | < 0.001      | < 0.001           | < 0.001      | < 0.001     | < 0.001      | < 0.001         | < 0.001     |             |
|                   | <b>Tongue</b>           | < 0.001      | < 0.001           | < 0.001      | < 0.001     | < 0.001      | < 0.001         | < 0.001     | < 0.001     |

|                   |                         | <b>Feces</b> | <b>Freshwater</b> | <b>Creek</b> | <b>Mock</b> | <b>Ocean</b> | <b>Sediment</b> | <b>Skin</b> | <b>Soil</b> |
|-------------------|-------------------------|--------------|-------------------|--------------|-------------|--------------|-----------------|-------------|-------------|
| <b>r1n0p75q30</b> | <b>Freshwater</b>       | 1            |                   |              |             |              |                 |             |             |
|                   | <b>Freshwater Creek</b> | 1            | 1                 |              |             |              |                 |             |             |
|                   | <b>Mock</b>             | 1            | 0.693             | 1            |             |              |                 |             |             |
|                   | <b>Ocean</b>            | 0.819        | 1                 | 1            | < 0.001     |              |                 |             |             |
|                   | <b>Sediment Estuary</b> | 0.357        | 1                 | 1            | 0.042       | 0.021        |                 |             |             |
|                   | <b>Skin</b>             | -            | -                 | -            | -           | -            | -               | -           | -           |
|                   | <b>Soil</b>             | -            | -                 | -            | -           | -            | -               | -           | -           |
|                   | <b>Tongue</b>           | 1            | 1                 | 1            | 1           | 1            | -               | -           | 1           |

## Weighted UniFrac

Corrected Bonferroni *P* value at 1000 Monte Carlo Iterations

|                |                         | <b>Feces</b> | <b>Freshwater</b> | <b>Creek</b> | <b>Mock</b> | <b>Ocean</b> | <b>Sediment</b> | <b>Skin</b> | <b>Soil</b> |
|----------------|-------------------------|--------------|-------------------|--------------|-------------|--------------|-----------------|-------------|-------------|
| <b>r1n0p25</b> | <b>Freshwater</b>       | < 0.001      |                   |              |             |              |                 |             |             |
|                | <b>Freshwater Creek</b> | < 0.001      | 1                 |              |             |              |                 |             |             |
|                | <b>Mock</b>             | 1            | 0.036             | 0.108        |             |              |                 |             |             |
|                | <b>Ocean</b>            | < 0.001      | 0.9               | 1            | < 0.001     |              |                 |             |             |
|                | <b>Sediment Estuary</b> | < 0.001      | 1                 | 1            | < 0.001     | < 0.001      |                 |             |             |
|                | <b>Skin</b>             | < 0.001      | 1                 | 1            | 0.072       | < 0.001      | < 0.001         |             |             |
|                | <b>Soil</b>             | < 0.001      | 0.18              | 0.324        | < 0.001     | < 0.001      | < 0.001         | < 0.001     |             |
|                | <b>Tongue</b>           | 1            | 1                 | 1            | 1           | 1            | 1               | 1           | 0.036       |

|                |                         | <b>Feces</b> | <b>Freshwater</b> | <b>Creek</b> | <b>Mock</b> | <b>Ocean</b> | <b>Sediment</b> | <b>Skin</b> | <b>Soil</b> |
|----------------|-------------------------|--------------|-------------------|--------------|-------------|--------------|-----------------|-------------|-------------|
| <b>r1n0p50</b> | <b>Freshwater</b>       | < 0.001      |                   |              |             |              |                 |             |             |
|                | <b>Freshwater Creek</b> | < 0.001      | 1                 |              |             |              |                 |             |             |
|                | <b>Mock</b>             | 1            | < 0.001           | 0.324        |             |              |                 |             |             |
|                | <b>Ocean</b>            | < 0.001      | 1                 | 1            | < 0.001     |              |                 |             |             |
|                | <b>Sediment Estuary</b> | < 0.001      | 1                 | 1            | < 0.001     | 0.576        |                 |             |             |
|                | <b>Skin</b>             | < 0.001      | 1                 | 1            | 0.072       | 0.036        | 0.144           |             |             |
|                | <b>Soil</b>             | < 0.001      | 0.288             | 1            | < 0.001     | < 0.001      | 0.072           | < 0.001     |             |
|                | <b>Tongue</b>           | 0.144        | 1                 | 1            | 1           | 1            | 1               | 1           | 1           |





|                 |                         | <b>Feces</b> | <b>Freshwater</b> | <b>Creek</b> | <b>Mock</b> | <b>Ocean</b> | <b>Sediment</b> | <b>Skin</b> | <b>Soil</b> |
|-----------------|-------------------------|--------------|-------------------|--------------|-------------|--------------|-----------------|-------------|-------------|
| <b>r1n1p75</b>  | <b>Freshwater</b>       | < 0.001      |                   |              |             |              |                 |             |             |
|                 | <b>Freshwater Creek</b> | 0.288        | 1                 |              |             |              |                 |             |             |
|                 | <b>Mock</b>             | 1            | 0.288             | 1            |             |              |                 |             |             |
|                 | <b>Ocean</b>            | < 0.001      | 0.036             | 0.288        | < 0.001     |              |                 |             |             |
|                 | <b>Sediment Estuary</b> | < 0.001      | 0.18              | 1            | < 0.001     | < 0.001      |                 |             |             |
|                 | <b>Skin</b>             | < 0.001      | 1                 | 0.288        | 0.936       | < 0.001      | < 0.001         |             |             |
|                 | <b>Soil</b>             | < 0.001      | < 0.001           | 0.324        | < 0.001     | < 0.001      | < 0.001         | < 0.001     |             |
|                 | <b>Tongue</b>           | 1            | 1                 | 0.936        | 1           | < 0.001      | 1               | 1           | < 0.001     |
| <b>r1n5p75</b>  | <b>Feces</b>            | 0.036        |                   |              |             |              |                 |             |             |
|                 | <b>Freshwater Creek</b> | 0.468        | 1                 |              |             |              |                 |             |             |
|                 | <b>Mock</b>             | 1            | 0.828             | 1            |             |              |                 |             |             |
|                 | <b>Ocean</b>            | < 0.001      | 1                 | 1            | 0.108       |              |                 |             |             |
|                 | <b>Sediment Estuary</b> | < 0.001      | 0.756             | 1            | < 0.001     | 0.252        |                 |             |             |
|                 | <b>Skin</b>             | < 0.001      | 0.324             | 0.648        | 0.144       | < 0.001      | < 0.001         |             |             |
|                 | <b>Soil</b>             | < 0.001      | 0.036             | 0.432        | < 0.001     | < 0.001      | < 0.001         | < 0.001     |             |
|                 | <b>Tongue</b>           | 0.936        | 1                 | 1            | 1           | 0.216        | 0.756           | 1           | 0.036       |
| <b>r1n10p75</b> | <b>Feces</b>            | 0.072        |                   |              |             |              |                 |             |             |
|                 | <b>Freshwater Creek</b> | 0.36         | 1                 |              |             |              |                 |             |             |
|                 | <b>Mock</b>             | 1            | 0.612             | 1            |             |              |                 |             |             |
|                 | <b>Ocean</b>            | 0.108        | 1                 | 1            | 0.288       |              |                 |             |             |
|                 | <b>Sediment Estuary</b> | < 0.001      | 0.252             | 1            | < 0.001     | 0.144        |                 |             |             |
|                 | <b>Skin</b>             | < 0.001      | 0.072             | 0.792        | 0.036       | < 0.001      | < 0.001         |             |             |
|                 | <b>Soil</b>             | < 0.001      | < 0.001           | 0.468        | < 0.001     | < 0.001      | < 0.001         | < 0.001     |             |
|                 | <b>Tongue</b>           | 0.72         | 0.648             | 1            | 1           | 0.108        | 0.468           | 1           | 0.036       |
| <b>r2n0p75</b>  | <b>Feces</b>            | 0.036        |                   |              |             |              |                 |             |             |
|                 | <b>Freshwater Creek</b> | < 0.001      | 1                 |              |             |              |                 |             |             |
|                 | <b>Mock</b>             | 1            | 0.36              | < 0.001      |             |              |                 |             |             |
|                 | <b>Ocean</b>            | < 0.001      | 1                 | 0.18         | < 0.001     |              |                 |             |             |
|                 | <b>Sediment Estuary</b> | < 0.001      | 0.36              | 0.18         | < 0.001     | < 0.001      |                 |             |             |
|                 | <b>Skin</b>             | < 0.001      | 1                 | 0.108        | 1           | < 0.001      | 0.036           |             |             |
|                 | <b>Soil</b>             | < 0.001      | < 0.001           | < 0.001      | < 0.001     | < 0.001      | < 0.001         | < 0.001     |             |
|                 | <b>Tongue</b>           | 1            | 1                 | 0.108        | 1           | < 0.001      | 1               | 1           | 0.288       |
| <b>r5n0p75</b>  | <b>Feces</b>            | < 0.001      |                   |              |             |              |                 |             |             |
|                 | <b>Freshwater Creek</b> | 1            | 1                 |              |             |              |                 |             |             |
|                 | <b>Mock</b>             | 0.792        | 0.396             | 1            |             |              |                 |             |             |
|                 | <b>Ocean</b>            | < 0.001      | 1                 | 1            | < 0.001     |              |                 |             |             |
|                 | <b>Sediment Estuary</b> | < 0.001      | 1                 | 1            | < 0.001     | < 0.001      |                 |             |             |
|                 | <b>Skin</b>             | < 0.001      | 1                 | 0.792        | 0.648       | < 0.001      | 0.432           |             |             |
|                 | <b>Soil</b>             | < 0.001      | 0.036             | 0.792        | < 0.001     | < 0.001      | 0.036           | < 0.001     |             |
|                 | <b>Tongue</b>           | 0.252        | 1                 | 1            | 1           | 0.468        | 1               | 1           | 0.504       |

|                   |                         | <b>Feces</b> | <b>Freshwater</b> | <b>Creek</b> | <b>Mock</b> | <b>Ocean</b> | <b>Sediment</b> | <b>Skin</b> | <b>Soil</b> |
|-------------------|-------------------------|--------------|-------------------|--------------|-------------|--------------|-----------------|-------------|-------------|
| <b>r10n0p75</b>   | <b>Freshwater</b>       | < 0.001      |                   |              |             |              |                 |             |             |
|                   | <b>Freshwater Creek</b> | 0.252        | 1                 |              |             |              |                 |             |             |
|                   | <b>Mock</b>             | 1            | 0.036             | 1            |             |              |                 |             |             |
|                   | <b>Ocean</b>            | < 0.001      | 1                 | 1            | < 0.001     |              |                 |             |             |
|                   | <b>Sediment Estuary</b> | < 0.001      | 0.936             | 1            | 0.036       | < 0.001      |                 |             |             |
|                   | <b>Skin</b>             | < 0.001      | 0.864             | 1            | 1           | < 0.001      | 1               |             |             |
|                   | <b>Soil</b>             | < 0.001      | 0.072             | 1            | < 0.001     | < 0.001      | < 0.001         | < 0.001     |             |
|                   | <b>Tongue</b>           | 0.684        | 1                 | 1            | 1           | 0.18         | 1               | 1           | 0.504       |
| <b>r1n0p75q10</b> | <b>Feces</b>            | < 0.001      |                   |              |             |              |                 |             |             |
|                   | <b>Freshwater</b>       | < 0.001      |                   |              |             |              |                 |             |             |
|                   | <b>Freshwater Creek</b> | 0.036        | 1                 |              |             |              |                 |             |             |
|                   | <b>Mock</b>             | 1            | 0.108             | 0.18         |             |              |                 |             |             |
|                   | <b>Ocean</b>            | < 0.001      | 1                 | 0.396        | < 0.001     |              |                 |             |             |
|                   | <b>Sediment Estuary</b> | < 0.001      | 0.612             | 1            | < 0.001     | < 0.001      |                 |             |             |
|                   | <b>Skin</b>             | < 0.001      | 1                 | 0.18         | < 0.001     | < 0.001      | < 0.001         |             |             |
|                   | <b>Soil</b>             | < 0.001      | 0.108             | 0.144        | < 0.001     | < 0.001      | < 0.001         | < 0.001     |             |
| <b>Tongue</b>     | 0.072                   | 1            | 0.36              | 1            | 0.072       | 1            | 1               | 0.072       |             |
| <b>r1n0p75q20</b> | <b>Feces</b>            | 0.036        |                   |              |             |              |                 |             |             |
|                   | <b>Freshwater</b>       | 0.036        |                   |              |             |              |                 |             |             |
|                   | <b>Freshwater Creek</b> | 0.18         | 1                 |              |             |              |                 |             |             |
|                   | <b>Mock</b>             | 1            | 0.288             | 0.252        |             |              |                 |             |             |
|                   | <b>Ocean</b>            | < 0.001      | 1                 | 0.108        | < 0.001     |              |                 |             |             |
|                   | <b>Sediment Estuary</b> | < 0.001      | 1                 | 1            | 1           | 0.036        |                 |             |             |
|                   | <b>Skin</b>             | < 0.001      | 1                 | 0.18         | 1           | < 0.001      | 1               |             |             |
|                   | <b>Soil</b>             | < 0.001      | 0.288             | 0.18         | < 0.001     | < 0.001      | 0.504           | < 0.001     |             |
| <b>Tongue</b>     | 0.468                   | 0.648        | 0.648             | 1            | 0.036       | 1            | 1               | 0.684       |             |
| <b>r1n0p75q30</b> | <b>Feces</b>            | < 0.001      |                   |              |             |              |                 |             |             |
|                   | <b>Freshwater</b>       | < 0.001      |                   |              |             |              |                 |             |             |
|                   | <b>Freshwater Creek</b> | < 0.001      | 0.231             |              |             |              |                 |             |             |
|                   | <b>Mock</b>             | 0.189        | 0.336             | 0.063        |             |              |                 |             |             |
|                   | <b>Ocean</b>            | < 0.001      | 1                 | 0.252        | < 0.001     |              |                 |             |             |
|                   | <b>Sediment Estuary</b> | < 0.001      | 1                 | 1            | < 0.001     | 0.084        |                 |             |             |
|                   | <b>Skin</b>             | -            | -                 | -            | -           | -            | -               | -           |             |
|                   | <b>Soil</b>             | -            | -                 | -            | -           | -            | -               | -           |             |
| <b>Tongue</b>     | 0.147                   | 1            | 1                 | 1            | 1           | -            | -               | 1           |             |

## 1 Evaluation 1: Quality Filtration Impacts $\alpha$ -Diversity of Mock Communities

2 To determine how different filtration parameters affect estimates of microbial  
3 community composition, we measured within-sample ( $\alpha$ ) diversity of mock communities  
4 as the number of family-level and genus-level taxa detected using each filter set. Since the  
5 input community is known in this case, we can test whether a filtration strategy faithfully  
6 reconstructs the complete microbial community while detecting as few false OTUs as  
7 possible. Initially, we tested the cross-interaction of all filtering settings (Table S1) with a  
8 single GAIIX run (read length 100 nt) of three identical mock communities consisting of 67  
9 bacterial strains mixed at equal ratios (dataset 1, Table S2, Table S3)<sup>5, 12</sup>. We found that  $\alpha$ -  
10 diversity was modulated most strongly by parameters (p), (q), and OTU abundance  
11 threshold (c), while (r) and (n) had negligible impact (Figure S1-S3). High (q) settings  
12 yielded excessive filtration of sequences, resulting in a lower-than-expected family-level  
13 taxon count (16 bacterial families represented in mock samples) prior to (c) filtration  
14 (Figure 1). All primary filtration parameters except for high (q) values required secondary  
15 filtration with (c) to reach expected taxon counts, but the (c) threshold necessary was  
16 dependent upon the stringency of the initial filtration parameters. For example, a (c) value  
17 of  $\sim 0.0005\%$  (of total filtered sequences) was adequate for elevated (p) and (q) values to  
18 reach expected taxon counts, while a threshold of  $\geq 0.001\%$  was required for lower-  
19 stringency settings. This is lower than the previously recommended<sup>5</sup> (c) value of  $\geq 0.01\%$   
20 of all sequences to reach expected OTU counts using default filtration parameters in QIIME,  
21 a setting originally calibrated with this same mock community (dataset 1, Table S2). This  
22 disparity is due to the fact that the previous study was based on OTU count instead of taxon  
23 count, where multiple OTUs clustered by 97% similarity (the OTU classification set in both  
24 of these studies) may assign to the same genus-level taxon, whether this arises from minor  
25 sequencing error, PCR error, intra-genomic *rrn* copy number heterogeneity, or genotypic  
26 differences in a mixed, wild-type population. This disparity may be observed by  
27 comparison of Figure S2 (genus-level count) with Figure S3 (observed 97% OTUs); at  
28 settings retrieving the expected genus-level count, observed OTUs are still several-fold  
29 greater than expected genus ( $n = 29$ ) or even species ( $n = 67$ ) counts, as multiple OTUs are  
30 classified to the same genus, even after clustering at 97% similarity. Additionally,  
31 contaminating sequences from PCR reagents or growth media used to cultivate mock  
32 community members may contribute to the inherent error in any mock community  
33 comparison, and may explain a certain amount of variation between expected and  
34 observed  $\alpha$ -diversity counts in these data.

35  
36 Overall, the expected genus-level taxon counts could only be obtained with more  
37 stringent (p) and (c) settings ( $p \geq 0.75$ ,  $c \geq 0.005\%$ ) than those required for obtaining  
38 expected family-level counts. This is because truncated reads in each run did not reliably  
39 reach genus level, and most of the OTUs could only be assigned to higher-level taxonomies,

40 even if these OTUs represented a minority population. Taking these higher-level  
41 assignments into account, however, settings yielding as many as 75 observed “genera”  
42 (Figure S3) retrieved all expected genus-level and higher-level taxa, so the same settings  
43 necessary for accurate family-level assignment ( $p \geq 0.75$ ,  $c \geq 0.005\%$ ) can be used to  
44 observe genus-level distribution.

45  
46 Next, we tested the effect of all filtering settings (without primary filter cross-  
47 interaction) on five additional mock communities sequenced using the Illumina HiSeq,  
48 MiSeq, and GAIIx (datasets 2-6; Table S2), to confirm our original findings and determine  
49 whether platform-dependent differences and run-to-run variation impact filtering. These  
50 tests confirmed that (q) and (p) are important modulators of  $\alpha$ -diversity on all platforms,  
51 but the influence of these settings varied in strength on a run-to-run basis, independent of  
52 read length and sequencing platform (Figure S4-S5). These tests also confirmed that (r)  
53 and (n) settings are negligible in defining taxon counts (Figures S6-S7). Overall, (c) was the  
54 single most important variable needed to reach expected taxon counts, though it varied  
55 between 0.01% to 0.0001% depending upon (q) and (p) settings. Even at constant primary  
56 filter settings, the necessary (c) setting was inconsistent between runs in a platform- and  
57 length-independent manner. Using default primary settings ( $p = 0.75$ ,  $n = 0$ ,  $r = 1$ ,  $q = 3$ ),  
58 requisite (c) fluctuated in the range of 0.005% to 0.0005%.

59  
60 Given the unpredictability of run-to-run variations, giving rise to variable (c) filtering  
61 requirements, we recommend including defined mock communities in all short-amplicon  
62 sequencing runs. This is particularly pertinent for comparing samples between two or  
63 more runs, and will be a necessary component to all massive, multi-run comparisons. Even  
64 on a single-run basis, including a standard mock community will enable sensitive  
65 calibration of filtering parameters, identifying the most appropriate settings for a given  
66 sequencing run. This will avoid both losing valuable data by adhering to a conservative,  
67 arbitrarily assigned (c) setting, and admitting spurious OTUs arising from PCR and  
68 sequencing error.

69  
70 Another factor that may complicate OTU threshold filtering (c) is the degree of  
71 similarity of sample types included in a single sequencing run. All filtering parameters in  
72 this study were tested against single mock communities on an individual basis. By applying  
73 an OTU abundance threshold (c) *globally* to all samples in a single sequencing run (or  
74 subset), one makes the assumption that all samples within that set contain homogeneous  
75 populations at comparable abundances. This is rarely the case, and applying a single (c)  
76 setting globally may result in the loss of rare taxa observed within a single sample or  
77 treatment group. If rare taxa are an important component of a given study or if highly  
78 divergent sample types are being compared in a single sample set, samples should be (c)-  
79 filtered *locally*. In other words, (c) should be calibrated to a single mock community sample



80 and that setting applied to each sample individually, such that the OTU threshold is applied  
81 as a percentage of all sequences in a given sample instead of all sequences within a single  
82 dataset. This condition could not be fully evaluated using the data in this study, but is a  
83 relevant concern in some scenarios, and should be a consideration in the experimental  
84 design of sequencing studies.  
85

## 86 **Evaluation 2: Effect of Filtration Parameters on Taxonomic Distribution**

87 In most biological systems, we are not only concerned with how many OTUs are  
88 detected, but also the relative abundance of specific taxa comprising different communities.  
89 Thus, we were interested in whether different filtration parameters exerted an uneven  
90 impact on taxonomic distribution, favoring the detection of specific clades over others. The  
91 impact of filtration parameters on taxonomic distribution of mock communities (dataset 1)  
92 was consistent with  $\alpha$ -diversity estimates (Figure S8-S10). The parameters (n) and (r)  
93 display little impact, but increasing these values (especially (r)) appears to yield deeper  
94 taxonomic resolution of certain taxa that were poorly differentiated in the mock  
95 communities (e.g., *Enterobacteriaceae* from *Gammaproteobacteria*), leading to closer  
96 representation of the expected distribution. However, they also increased the abundance of  
97 some taxonomically shallow OTUs (e.g., “other *Clostridiales*”). The parameters (p) and (q)  
98 had the greatest impact, with increasing (p) values leading to decreased abundance of  
99 unassigned sequences and sequences given shallow taxonomic assignment. Increasing (q)  
100 up to 20 only marginally impacted taxonomic distribution of mock communities, leading to  
101 lower abundance of unassigned sequences and greater detection of minor taxa (e.g.,  
102 *Veillonellaceae*) but also of “other *Clostridiales*” and “other *Bifidobacteriales*”. Increasing (q)  
103 further resulted in unacceptably high sequence filtration (97.7% of raw sequences filtered  
104 at q = 30), leading to poor replication of expected taxonomic distribution in mock  
105 communities.

106

107

108

## 109 **Evaluation 3: Filtration Does Not Significantly Impact Within-Sample $\beta$ -Diversity** 110 **Comparisons**

111 As biological observations are often drawn from between-sample ( $\beta$ ) diversity  
112 comparisons of complex microbial communities, we were interested in how different  
113 filtration parameters impacted phylogenetic distance between the same samples. To  
114 determine whether filtration altered assessments of  $\beta$ -diversity between settings, we

115 calculated unweighted/weighted UniFrac distance<sup>11</sup> between mock community reads  
116 (dataset 1) filtered with different parameter settings at even sampling depth (Table S8).  
117 The only treatment resulting in a significant weighted UniFrac difference from the default  
118 setting was  $(p) = 1.0$  (Bonferroni-corrected  $p < 0.001$ ), indicating abundance-weighted  
119 phylogenetic differences between these settings. Variation in all parameters other than  $(c)$   
120 resulted in significant unweighted UniFrac differences from the default settings  
121 (Bonferroni-corrected  $p < 0.001$ ), signifying the existence of phylogenetic divergence  
122 between these settings and the default. These data suggest that phylogenetic diversity is  
123 impacted by most filtration parameters, but only among low-abundance OTUs.

124  
125

#### 126 **Evaluation 4: Extreme Filtration Settings Degrade Between-Sample $\beta$ -Diversity** 127 **Comparisons**

128 Next, we analyzed  $\beta$ -diversity differences between sample types within filtered  
129 sequence sets from mock, free-living, and host-associated communities (Table S9) using  
130 UniFrac<sup>11</sup> distance to determine how filtration impacted between-sample phylogenetic  
131 comparisons. All sample types were significantly different for all settings by unweighted  
132 UniFrac, except for  $(c) = 1000$  and  $(q) = 30$ . As all, or most, of these communities should  
133 exhibit some phylogenetic difference (without abundance weighting), this indicates that  
134 high OTU filtration  $(c)$  and Phred quality score  $(q)$  thresholds resulted in excessive  
135 depletions of diversity, leading to the observation of complete phylogenetic parity where  
136 little should exist (e.g., between freshwater and feces). Weighted UniFrac revealed a  
137 smaller number of significant differences, primarily separating host-associated and free-  
138 living sample types for most settings, though expected patterns of significance varied with  
139 the settings applied. The most notable exceptions were greatly increased  $(q)$  and  $(c)$   
140 settings, which led to loss of significance between sample types that should contain  
141 significant differences. As with unweighted UniFrac, this suggests that loss of diversity  
142 through extreme read filtration led to unacceptable phylogenetic convergence of these  
143 sample types. Interestingly, decreased stringency (e.g.,  $p = 0.25$ ) led to loss of significance  
144 between only a few sample types, and even then only between host-associated or free-  
145 living communities, retaining the expected biological result. Additionally, this  
146 demonstrates that conclusions from phylogeny-based distance metrics are robust to  
147 sequence quality, such that the inclusion of a high abundance of truncated and/or low-  
148 quality reads does not significantly impact sample clustering.

149

150 To visualize  $\beta$ -diversity differences between communities analyzed with the GAIIX, we  
151 constructed principle coordinate analysis (PCoA) plots based on weighted UniFrac distance  
152 and used Procrustes analysis to compare PCoA plots between filtration settings. In a

153 comparison of host-associated and free-living communities described by Caporaso et al<sup>5</sup>, all  
154 settings yielded the expected pattern, separating free-living and host-associated samples,  
155 but with different degrees of similarity to the default filtration settings. Increasing (c)  
156 values resulted in increasingly divergent PCoA plots (Figure S11), and gradual loss of  
157 significance at (c) > 0.01% (Bonferroni-corrected  $p_{c=1000} = 0.020$ ; Bonferroni-corrected  
158  $p_{c=10000} = 0.171$ ). All other comparisons (Figure 2; Figure S12; data not shown for (r) and  
159 (n)) yielded highly significant  $M^2$  values ( $p < 0.001$ ) before correction, but insignificant  
160 Bonferroni-corrected  $M^2$  values ( $p > 0.05$ ), suggesting that adjusting these filtration  
161 parameters alters beta-diversity assessments made by PCoA. As PCoA is commonly used to  
162 visualize  $\beta$ -diversity differences between microbial communities, inappropriate filtration  
163 parameters may result in misleading assessments of diversity, depending on the scenario.  
164 In this case, the same conclusions could be drawn from PCoA of most settings (host-  
165 associated and free-living community separation) and significant differences among PCoAs  
166 are not as important as this conserved biological pattern. With this goal in mind, pattern  
167 recognition was most altered by high values of (c) and (q), which blurred the boundary  
168 between host-associated and free-living communities.

169 Most experimental assessments of microbial communities are not concerned with  
170 differentiating highly divergent samples, but rather rely on sensitive separation of subtly  
171 different sample types to arrive at valuable conclusions. Therefore, the impact of filtering  
172 parameters on weighted and unweighted UniFrac  $\beta$ -diversity was also tested on closely  
173 related microbial communities whose diversity patterns exhibit either cluster or gradient  
174 effects. These communities consisted of spontaneous beer fermentations<sup>10</sup> and modern  
175 (inoculated with *Saccharomyces cerevisiae*) versus traditional (un-inoculated) wine  
176 fermentations<sup>9</sup>, respectively. These spontaneous beer fermentation communities should  
177 exhibit age-dependent, gradient-type UniFrac clustering, following the transition from  
178 *Enterobacteriaceae*-rich to *Lactobacillaceae*-dominated communities during the  
179 fermentation<sup>10</sup>. Following the observations of our previous study<sup>9</sup>, the traditional versus  
180 modern wine fermentations should exhibit a subtle UniFrac clustering pattern, as only a  
181 small number of bacterial taxa explain the differences between these two groups, relating  
182 to the suppression of specific bacteria by yeast inoculation. Even extreme filtering settings  
183 did not alter the expected age-dependent community shifts of spontaneous beer  
184 fermentations as assessed by weighted UniFrac PCoA (Figure S13) and unweighted UniFrac  
185 PCoA (Figure S14). Unweighted UniFrac was highly resilient to filtering setting changes, but  
186 a slight impact was seen in the weighted UniFrac data under certain conditions.  
187 Specifically, the expected community shift was blurred under the settings (q = 10) and (r =  
188 5), but conserved by all higher and lower settings for these same parameters.

189 The un-inoculated and inoculated wine communities exhibit even fewer differences,  
190 which are related to minor bacterial OTUs as opposed to bulk population succession, and  
191 weakly cluster apart from each other. The delicate cluster pattern differentiating these  
192 highly similar groups with weighted UniFrac was degraded under extreme filtering settings

193 (Figure S15). Gradual dissolution of clusters can be observed with increasing (q) settings,  
194 ( $r \geq 5$ ), and ( $n = 10$ ), but weighted UniFrac clustering is universally weak, due to a high  
195 degree of similarity between these communities. Unweighted UniFrac (Figure S16) more  
196 clearly differentiates these communities, as minor taxa are the primary OTUs  
197 differentiating the un-inoculated and inoculated wine fermentations. Under different  
198 filtering settings, unweighted UniFrac is unaffected, demonstrating the same cluster  
199 pattern throughout (Figure S16). Taken together, these data indicate that phylogeny-based  
200 diversity metrics are highly resilient to changes in filtering settings, and will yield similar  
201 observations, except in the case of extreme settings.

202  
203

## 204 **Evaluation 5: Filtration Settings Exhibit Similar Impact Across Illumina Platforms**

205 Finally, we wanted to confirm that quality filtration guidelines developed on the  
206 Illumina GAIIx would be equally valid for the HiSeq2000 and MiSeq systems, ensuring that  
207 these parameters would be robust to changes in sequencing chemistry as these platforms  
208 continue to evolve. To do this, we calculated weighted UniFrac distance between “free-  
209 living” and host-associated communities sequenced on these three systems (datasets 1, 7,  
210 8; Table S7). Procrustes weighted UniFrac PCoA biplots revealed the same trends on the  
211 HiSeq as on the GAIIx: heavily decreased (p) and increased (q) are the only factors that  
212 significantly impacted phylogenetic distance and degraded the expected separation of  
213 samples (data not shown). The MiSeq revealed the same trends, but significant differences  
214 between community types were produced even with extreme values, except for (c) > 0.1%  
215 (data not shown), indicating that these reads were more resistant to quality filtering-  
216 induced changes in  $\beta$ -diversity; this is because the greater read length achieved on the  
217 MiSeq (150 nt) dampened the impact of shorter, lower-quality sequences admitted by, for  
218 example, decreased (p) settings, and significance (Bonferroni-corrected  $p < 0.05$ ) is lost by  
219 truncating the reads to 90 nt prior to OTU picking (the mean read length of HiSeq reads  
220 post-filtering) (Figure S19). This observation suggests that increased sequence length  
221 allows even greater flexibility in quality filtration. Nevertheless, the fact that all three  
222 systems reconstruct the same known biological result supports the creation of a baseline  
223 default setting that will be appropriate for all platforms, and users may adjust downstream  
224 according to sequence length and quality. We note that non-Bonferroni-corrected p-values  
225 are still significant even at these extreme settings on all platforms, and the visual  
226 separation of free-living from host-associated communities in PCoA plots is still retained;  
227 this suggests that even with these extreme parameter settings, it is unlikely that a  
228 researcher would derive different biological conclusions from the results.

229 Interestingly, even with extreme parameter settings on the MiSeq, the overall split  
230 between host-associated and free-living communities remained statistically significant

231 (data not shown), indicating that MiSeq data is more robust to quality-filtering parameters  
232 than the HiSeq 2000 and GAIIx. This result was due to the increased length of the MiSeq  
233 reads (150 bp). When the MiSeq reads were truncated to 90 bp prior to OTU picking (the  
234 median length of the truncated HiSeq2000 reads) extreme filtering settings ( $p = 0.25$ ;  $q =$   
235  $20$ ) also resulted in a loss of statistical significance for the separation between host-  
236 associated and free-living communities (data not shown), indicating that filtering behavior  
237 is consistent across all three platforms.

238

### 239 **Default recommendations for QIIME parameters**

240 Our findings have informed new default parameter settings in QIIME's  
241 `split_libraries_fastq.py` and a recommended parameter for the optional  
242 `filter_otus_from_otu_table.py` script. The updated parameter defaults for  
243 `split_libraries_fastq.py` are ( $r = 3$ ;  $p = 0.75$ ;  $q = 3$ ;  $n = 0$ ), and the recommend parameter  
244 setting for `filter_otus_from_otu_table.py` is (`--min_count` of 0.005%). Note that the `--`  
245 `min_count` setting can also be passed as the `--min_otu_size` parameter to  
246 `pick_subsampled_reference_otus_through_otu_table.py`. Since  
247 `filter_otus_from_otu_table.py` is an optional script, users must call  
248 `filter_otus_from_otu_table.py` with this parameter setting to incorporate this filter.
